# Supplementary material for: Regioselective N- versus P-Deprotonation of Aminophosphane Tungsten(0) Complexes
Source: MDPI journal article supplement (doi:10.3390/org3030013), 2022-06-22
Supplement: s1 [file s1]

## Supplementary Information

# Regioselective N- versus P-deprotonation of aminophosphane tungsten(0) complexes

Tatjana Terschüren,<sup>a</sup> Philip Junker,<sup>a</sup> Alexander Schmer,<sup>a</sup> Arturo Espinosa Ferao<sup>\*b</sup> and Rainer Streubel<sup>\*a</sup>

<sup>a</sup> Prof. Dr. R. Streubel, M. Sc. Tatjana Terschüren, Dr. P. Junker, Dr. A. Schmer Institute of Inorganic Chemistry, University of Bonn, Gerhard-Domagk-Str. 1 53115 Bonn, Germany. Email: r.streubel@uni-bonn.de  
<https://www.chemie.uni-bonn.de/akstreubel>

<sup>b</sup> Prof. Dr. A. Espinosa Ferao, Departamento de Química Orgánica, Facultad de Química, Universidad de Murcia, Campus de Espinardo, 30100 Murcia, Spain. Email: artuesp@um.es  
<https://www.um.es/funcmolecma/artuesp>

## Table of contents

|                                                           |           |
|-----------------------------------------------------------|-----------|
| <b>1. NMR spectra of compounds 3-7 .....</b>              | <b>3</b>  |
| 1.1 Complex <b>3a</b> .....                               | 3         |
| 1.2 Complex <b>3b</b> .....                               | 4         |
| 1.3 Complex <b>3c</b> .....                               | 5         |
| 1.4 Complex <b>3d</b> .....                               | 6         |
| 1.5 Complex <b>3e</b> .....                               | 7         |
| 1.6 Complex <b>3f</b> .....                               | 8         |
| 1.7 Compound <b>Li-4b</b> .....                           | 9         |
| 1.8 Compound <b>Li-5b</b> .....                           | 10        |
| 1.9 Compound <b>K-5b</b> .....                            | 11        |
| 1.10 Complex <b>7b</b> .....                              | 12        |
| <b>2. Stacked NMR spectra of reaction monitoring.....</b> | <b>13</b> |
| 2.1 Decomposition of <b>Li-5b</b> .....                   | 13        |
| 2.2 Reaction of <b>Li-5b</b> with MeI.....                | 14        |
| <b>3. Computational Part.....</b>                         | <b>15</b> |

# 1. NMR spectra of compounds 3-7

## 1.1 Complex 3a

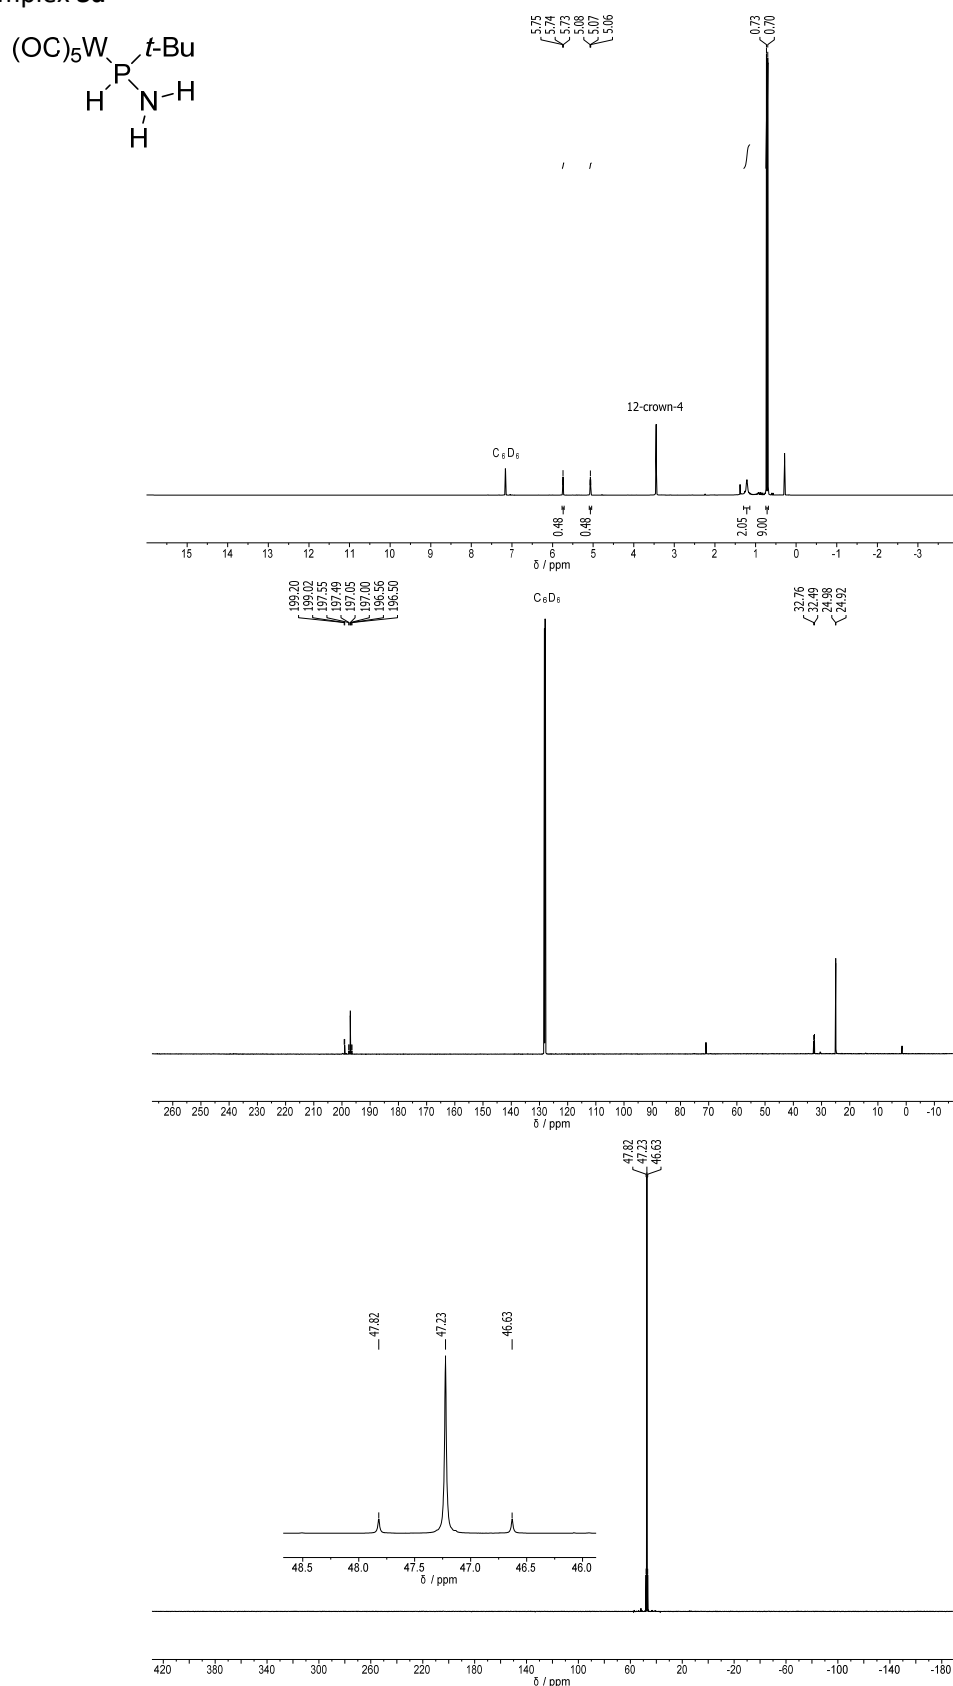

**Figure S1.**  $^1H$  NMR (top),  $^{13}C\{^1H\}$  NMR (mid) and  $^{31}P\{^1H\}$  NMR (bottom) spectra of complex 3a in  $C_6D_6$ .

## 1.2 Complex **3b**

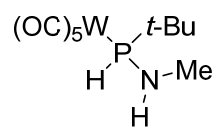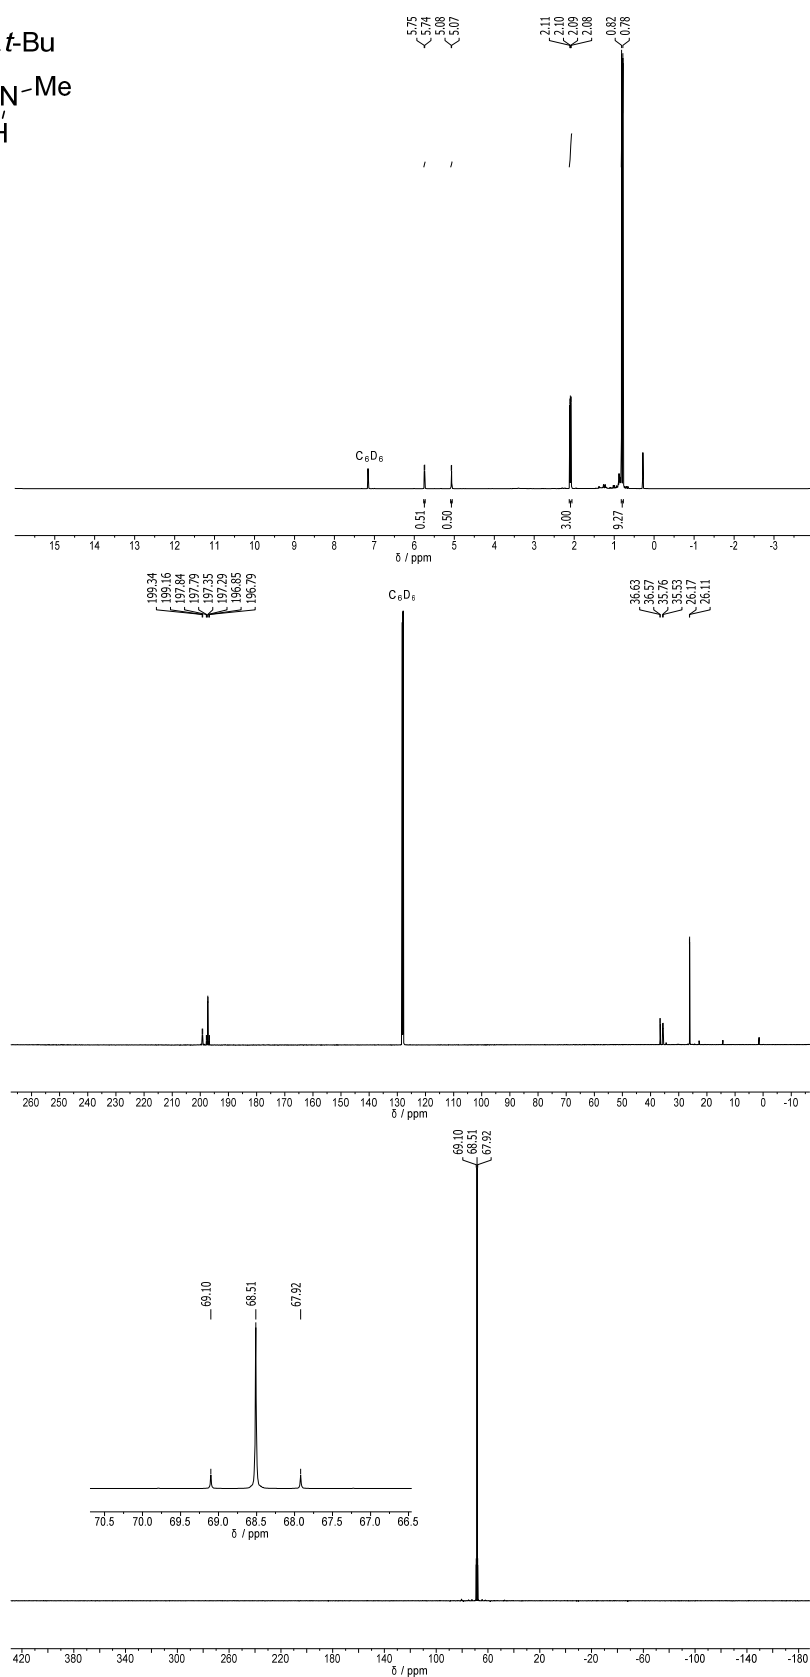

**Figure S2.**  $^1\text{H}$  NMR (top),  $^{13}\text{C}\{^1\text{H}\}$  NMR (mid) and  $^{31}\text{P}\{^1\text{H}\}$  NMR (bottom) spectra of complex **3b** in  $\text{C}_6\text{D}_6$ .

### 1.3 Complex **3c**

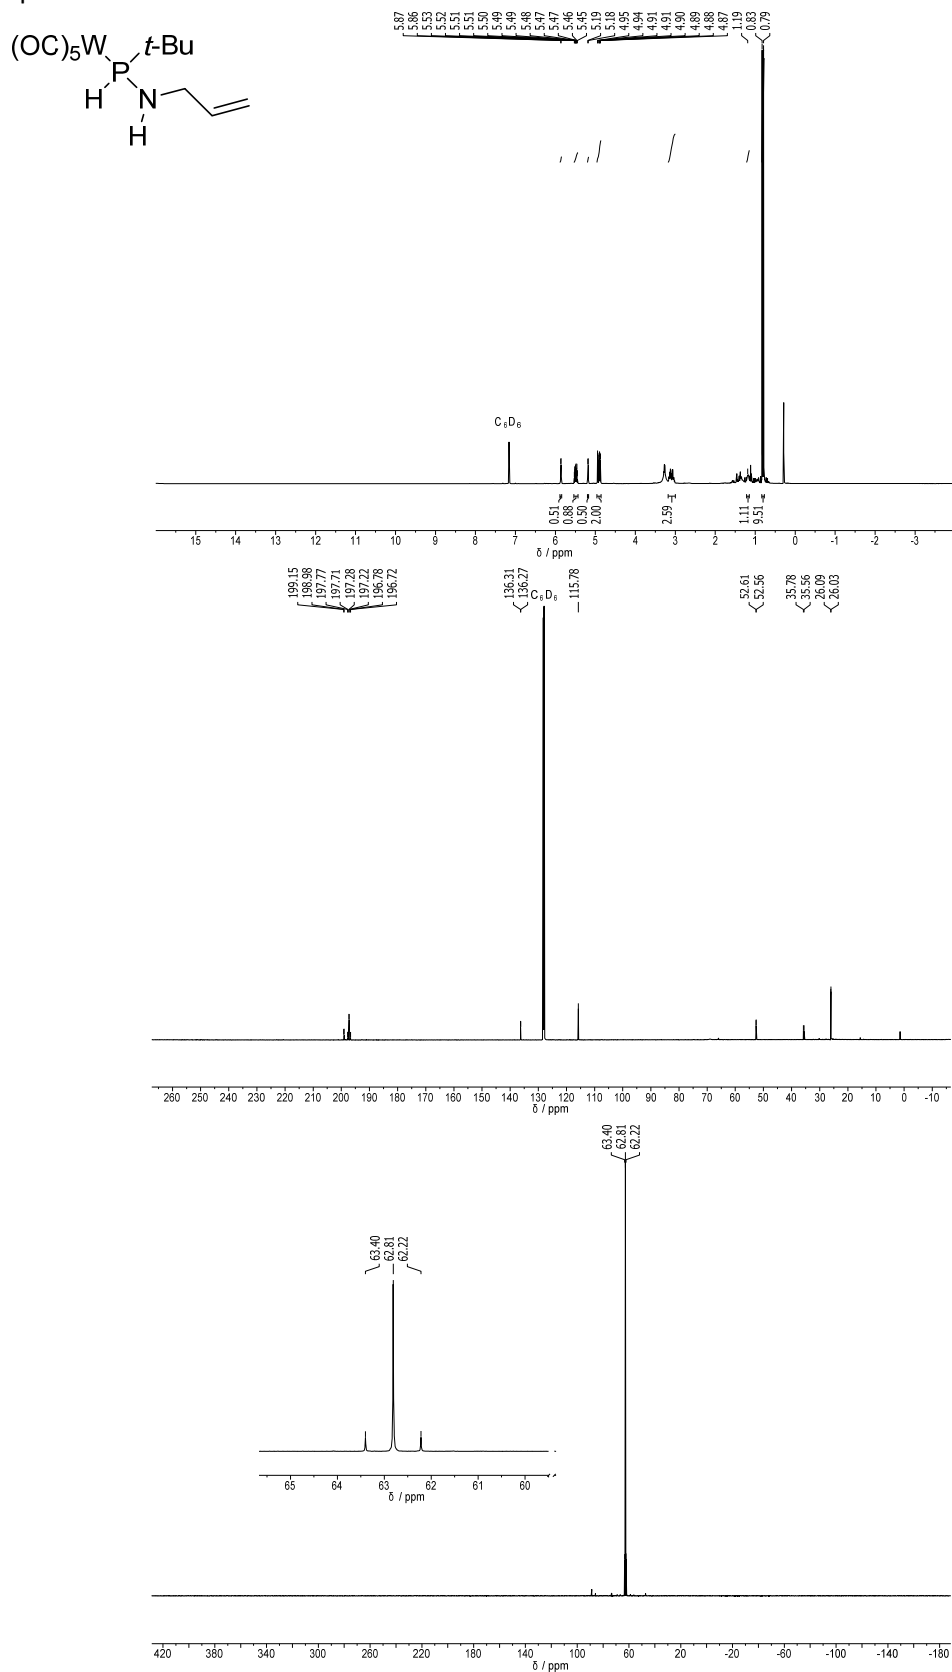

**Figure S3.**  $^1H$  NMR (top),  $^{13}C\{^1H\}$  NMR (mid) and  $^{31}P\{^1H\}$  NMR (bottom) spectra of complex **3c** in  $C_6D_6$ .

## 1.4 Complex **3d**

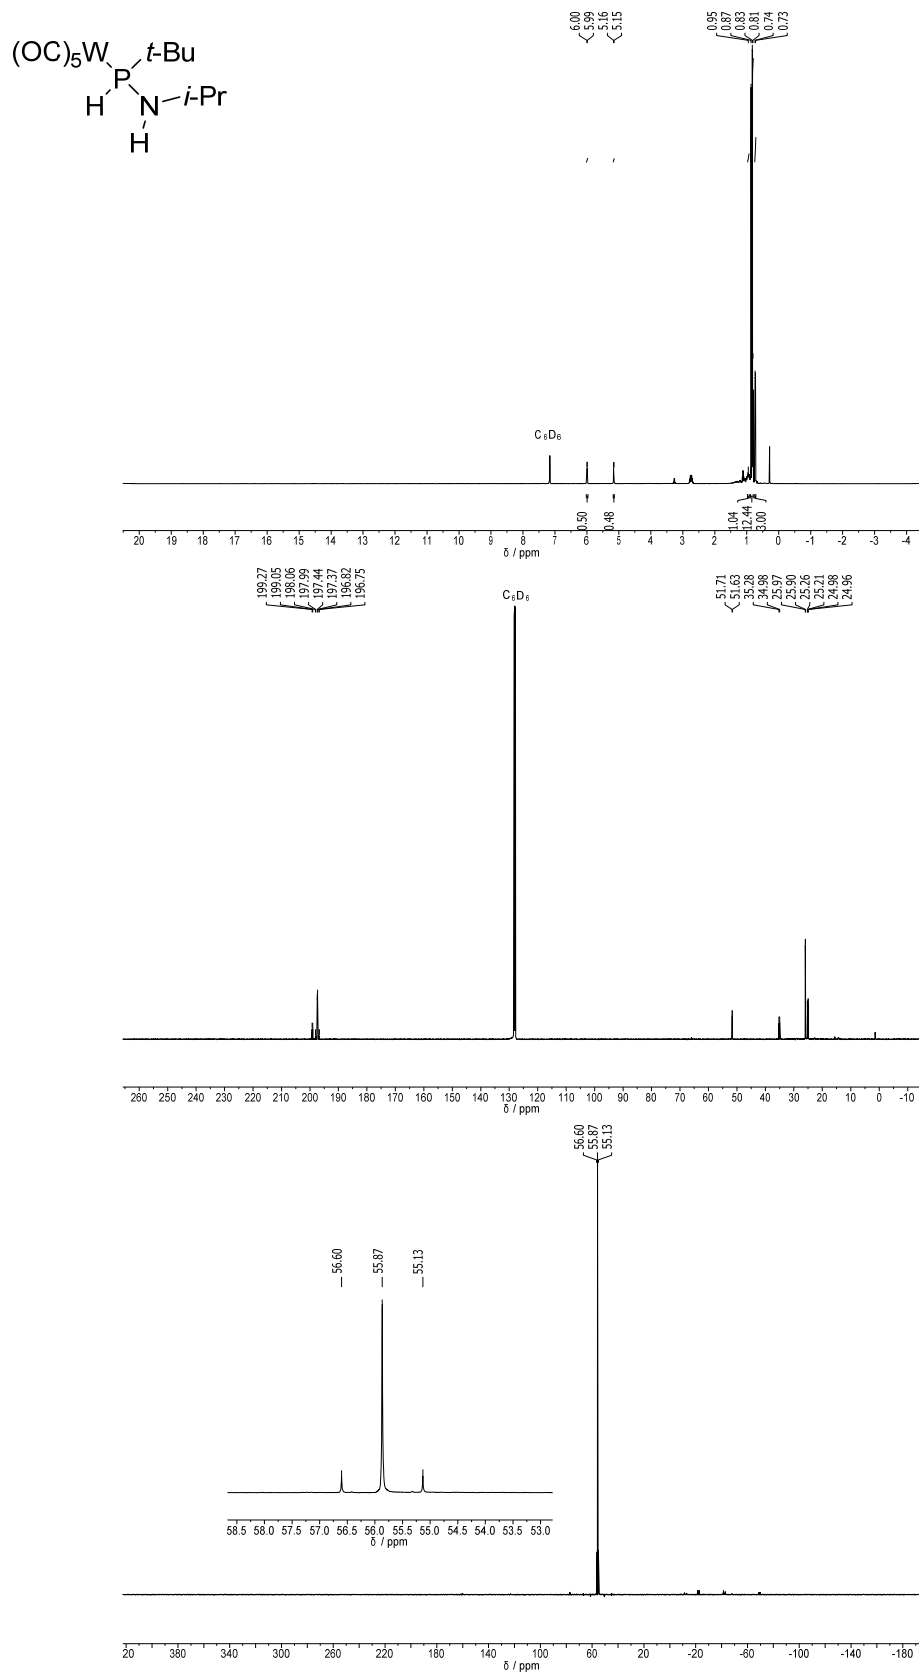

**Figure S4.**  $^1\text{H}$  NMR (top),  $^{13}\text{C}\{^1\text{H}\}$  NMR (mid) and  $^{31}\text{P}\{^1\text{H}\}$  NMR (bottom) spectra of complex **3d** in  $\text{C}_6\text{D}_6$ .

## 1.5 Complex **3e**

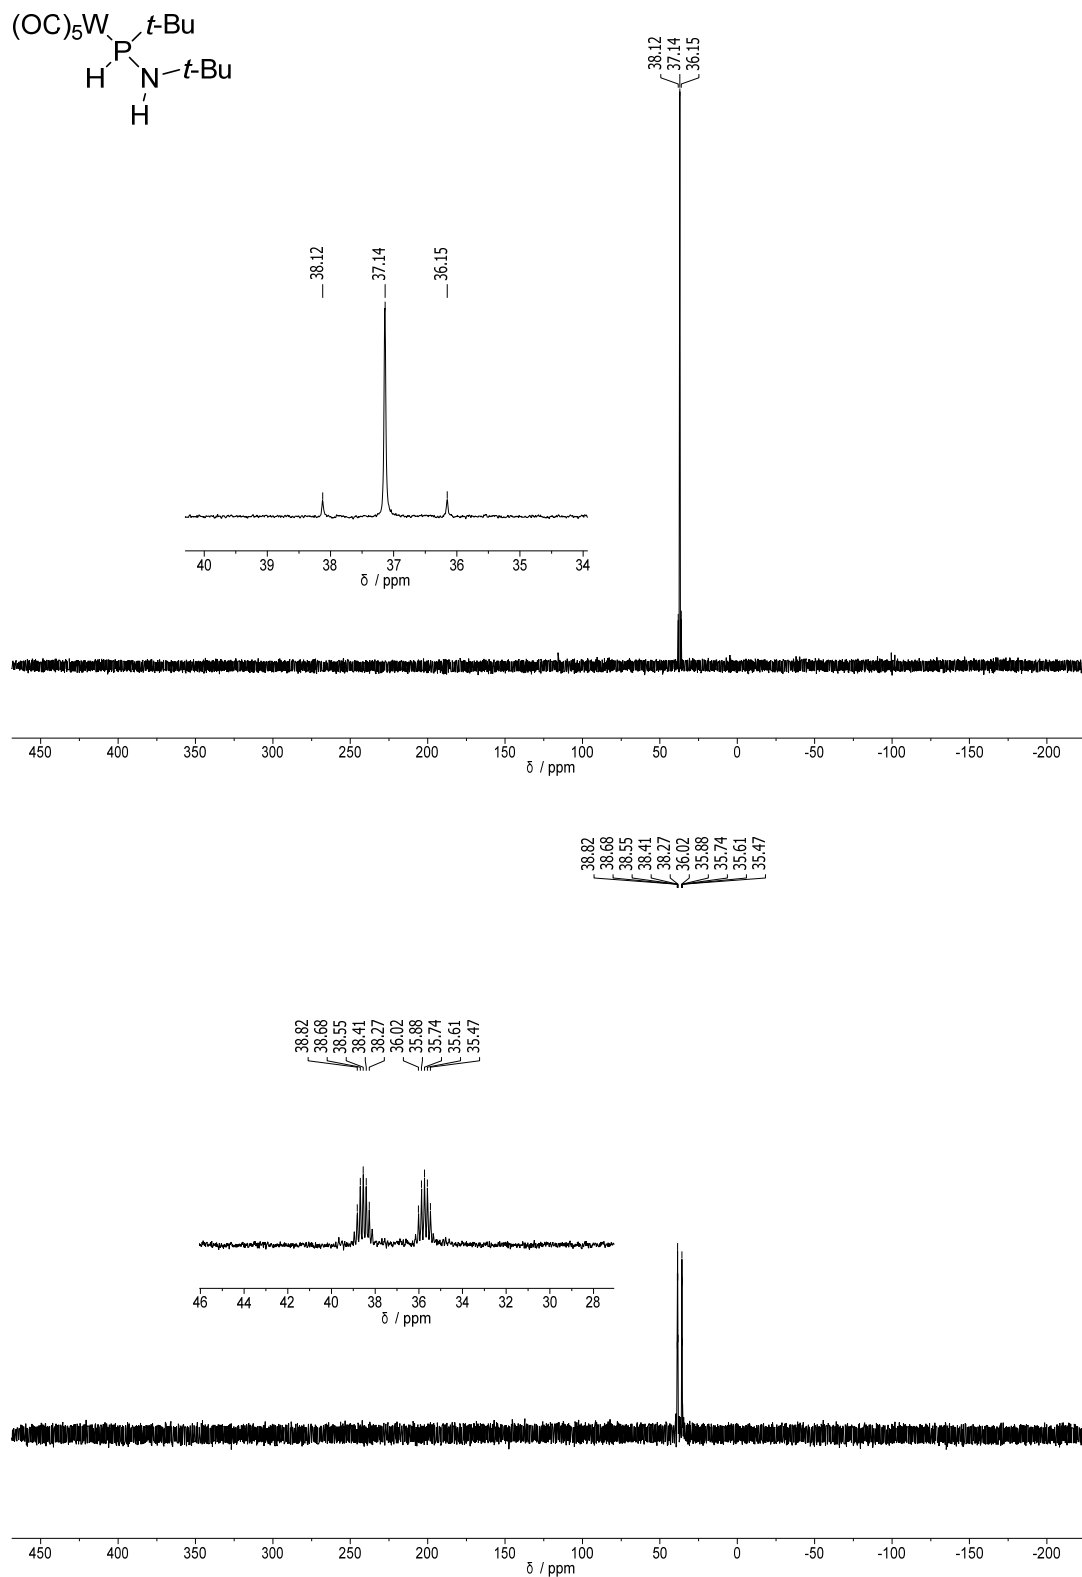

Figure S5.  $^{31}\text{P}\{^1\text{H}\}$  NMR (top) and  $^{31}\text{P}$  NMR (bottom) spectra of complex **3e** in THF.

## 1.6 Complex **3f**

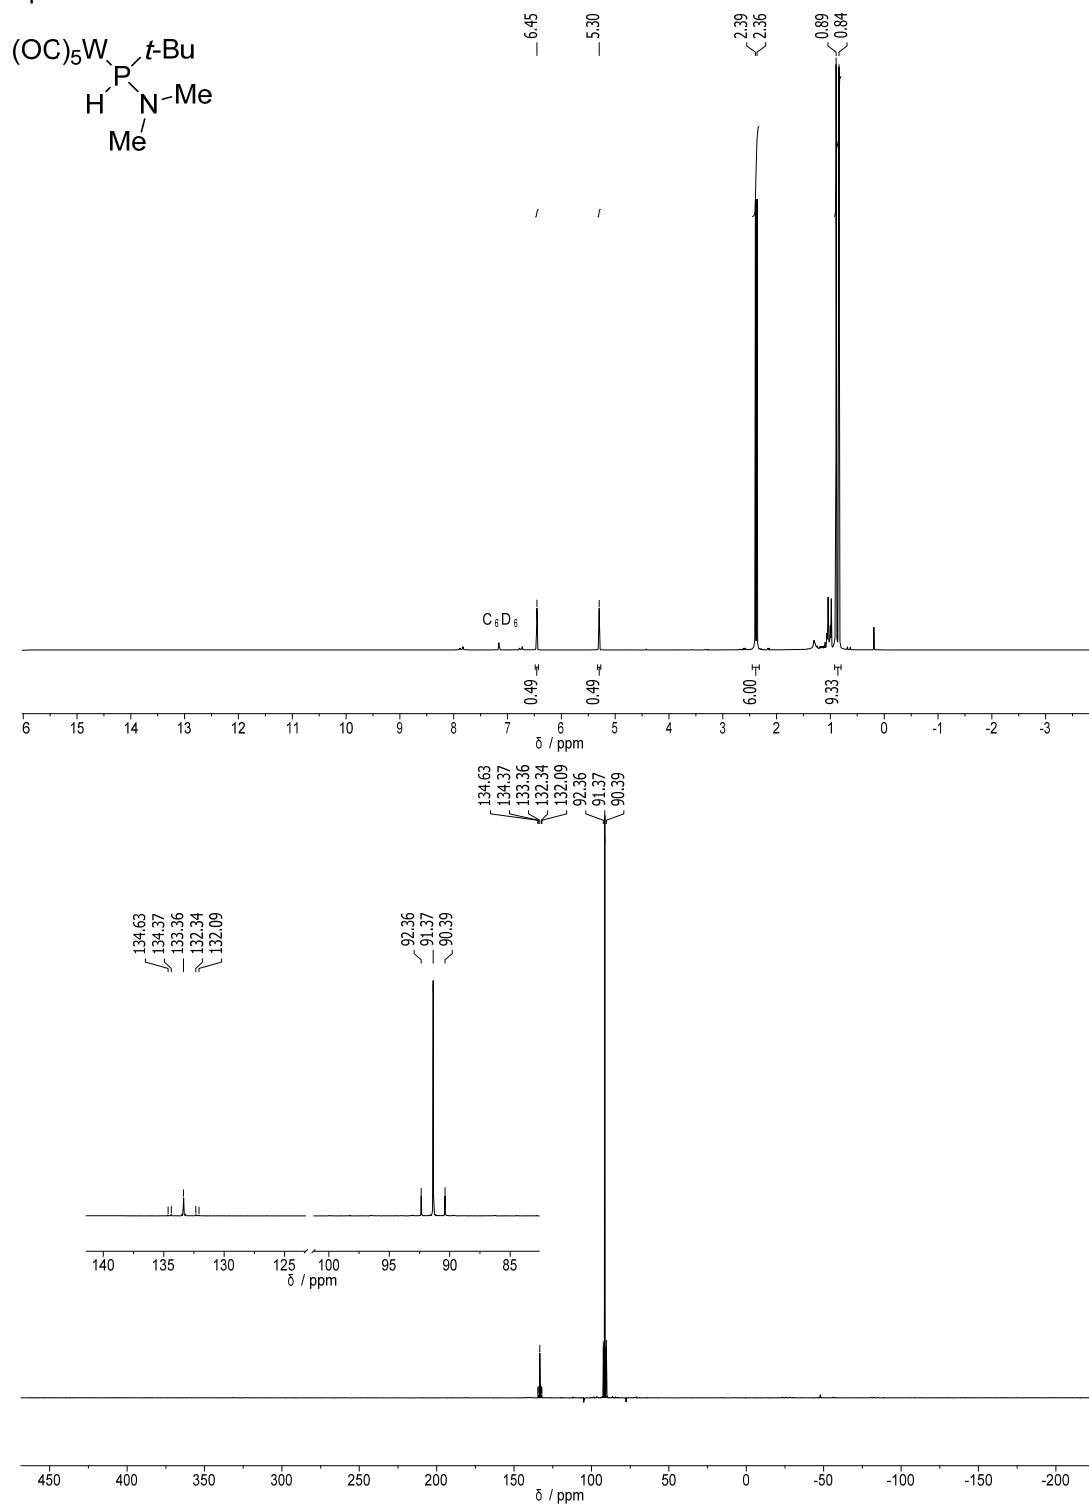

**Figure S6.** <sup>1</sup>H NMR (top) and <sup>31</sup>P{<sup>1</sup>H} NMR (bottom) spectra of complex **3f** in product mixture in C<sub>6</sub>D<sub>6</sub>.



## 1.7 Compound Li-4b

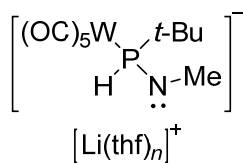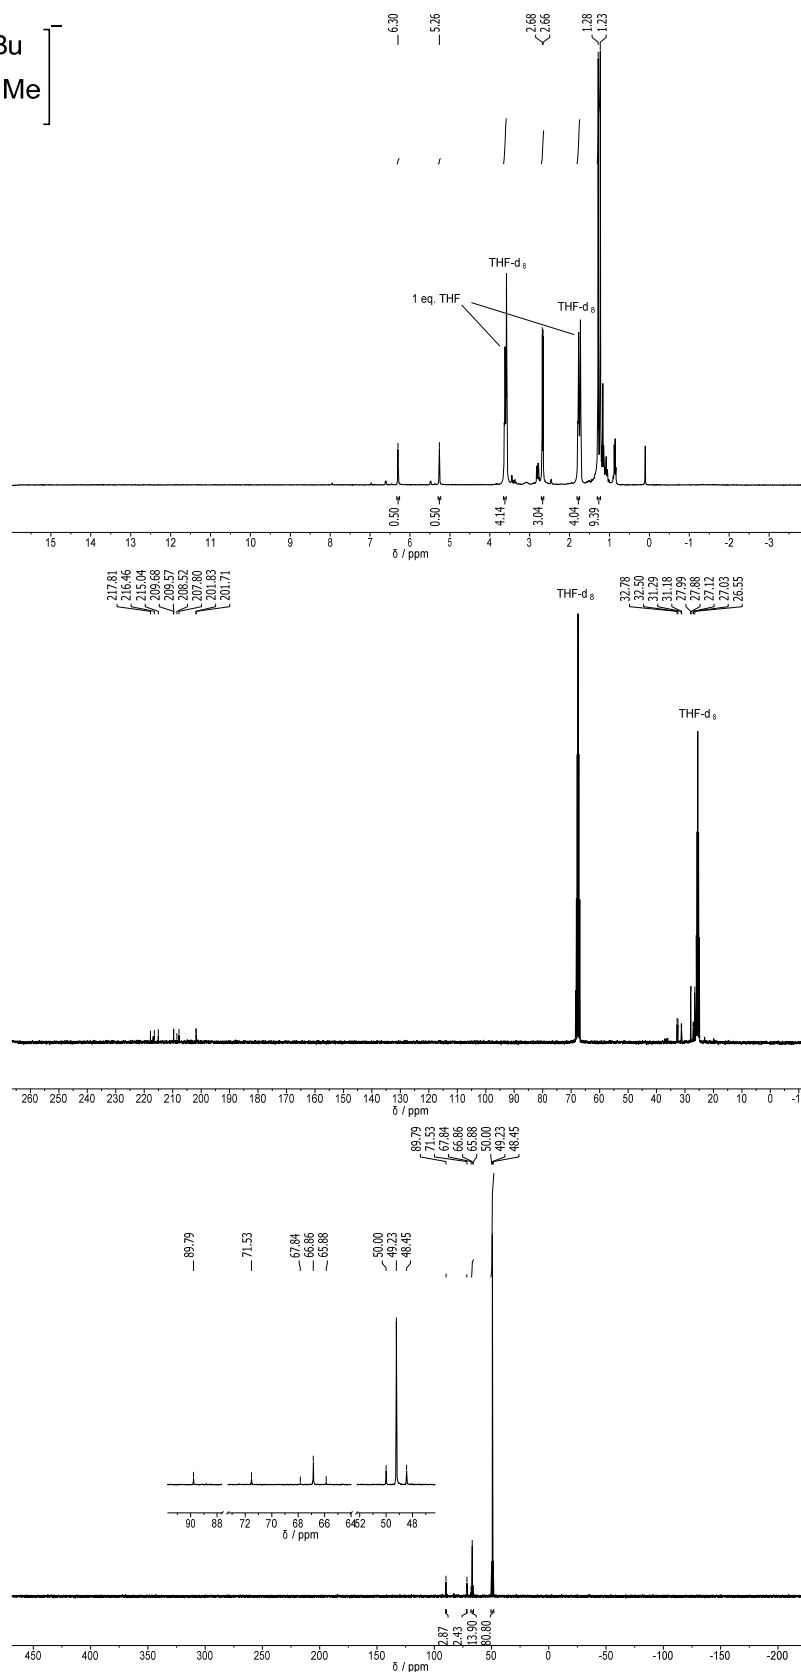

**Figure S7.** <sup>1</sup>H NMR (top), <sup>13</sup>C{<sup>1</sup>H} NMR (mid) and <sup>31</sup>P{<sup>1</sup>H} NMR (bottom) spectra of compound Li-4b in product mixture in THF-d<sub>8</sub>.

## 1.8 Compound Li-5b

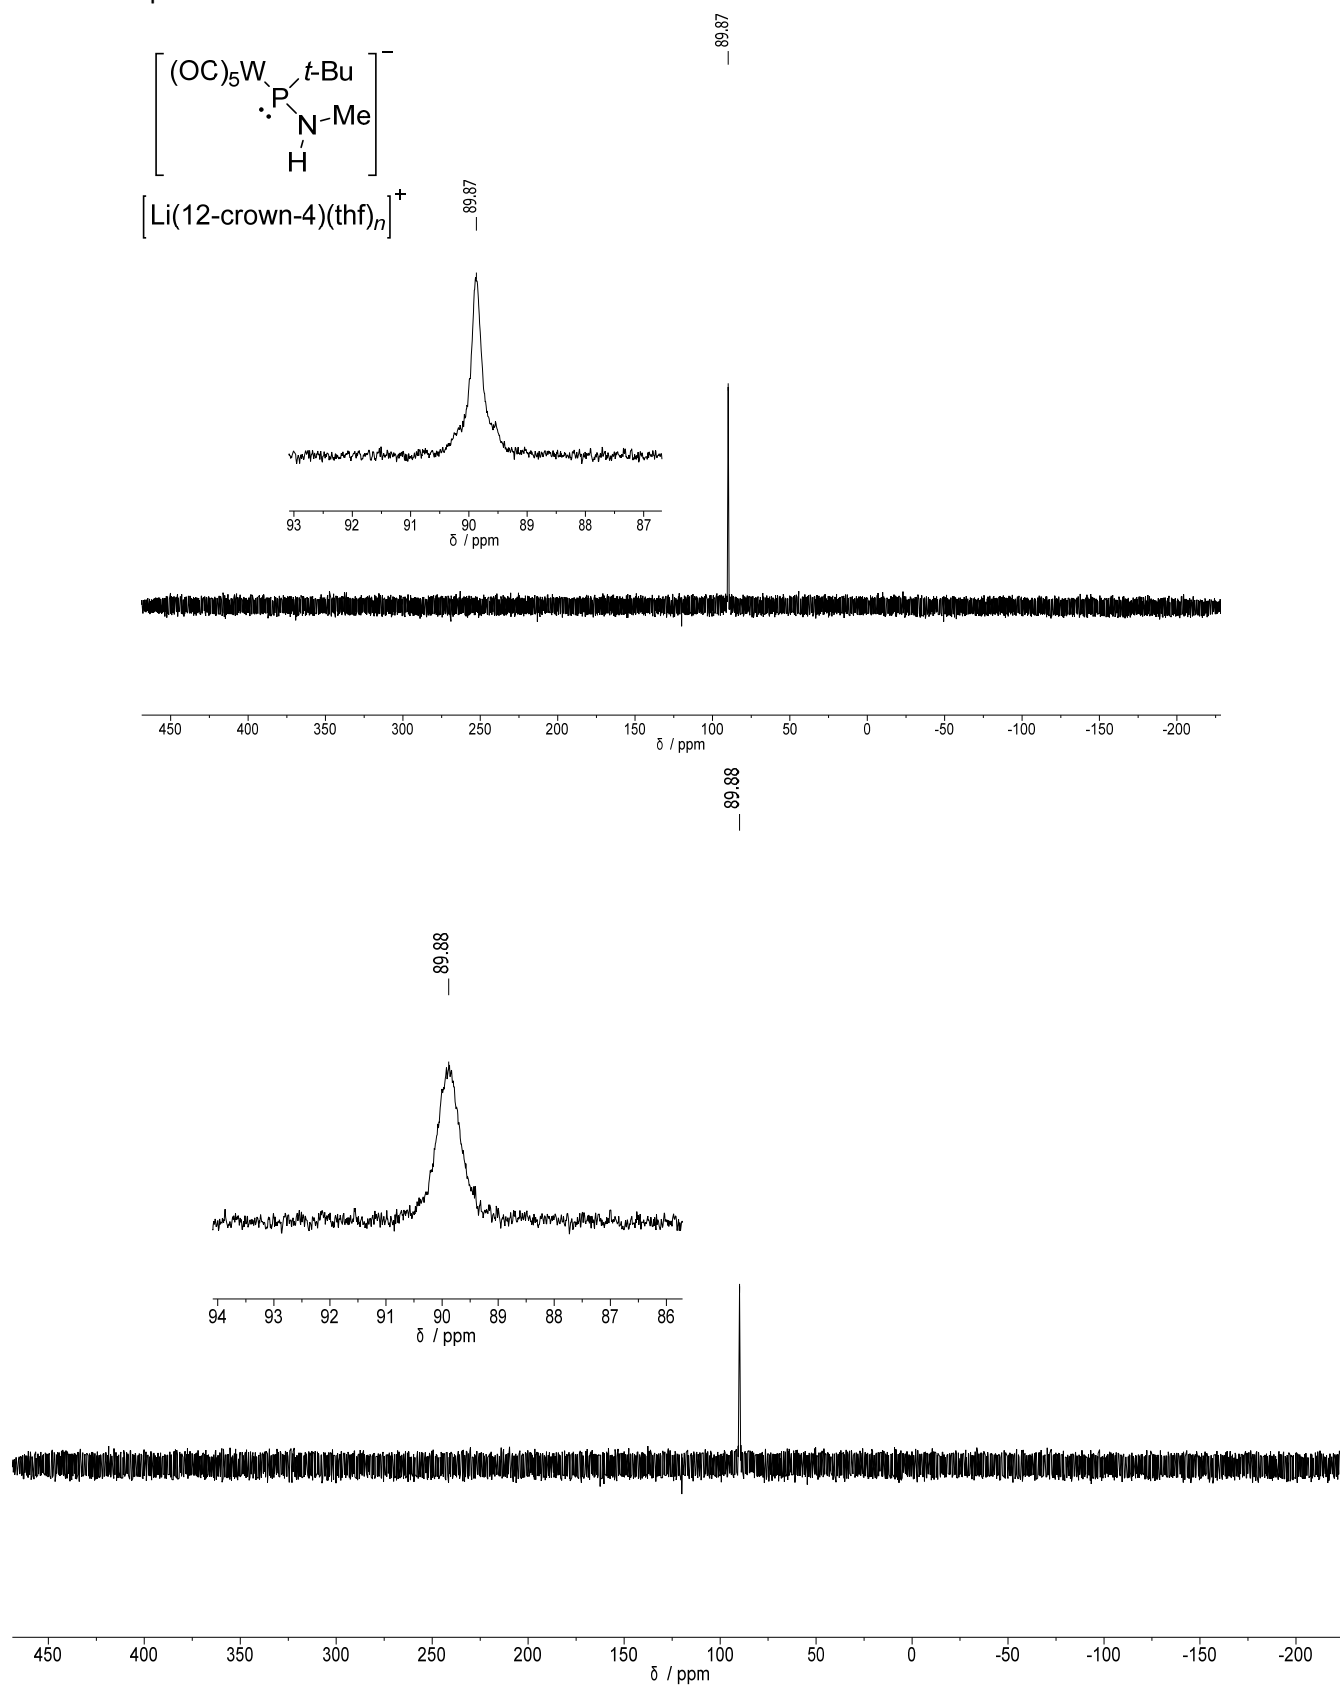

**Figure S8.**  $^{31}\text{P}\{^1\text{H}\}$  NMR (top) and  $^{31}\text{P}$  NMR (bottom) spectra of compound Li-5b in reaction mixture in THF.

## 1.9 Compound K-5b

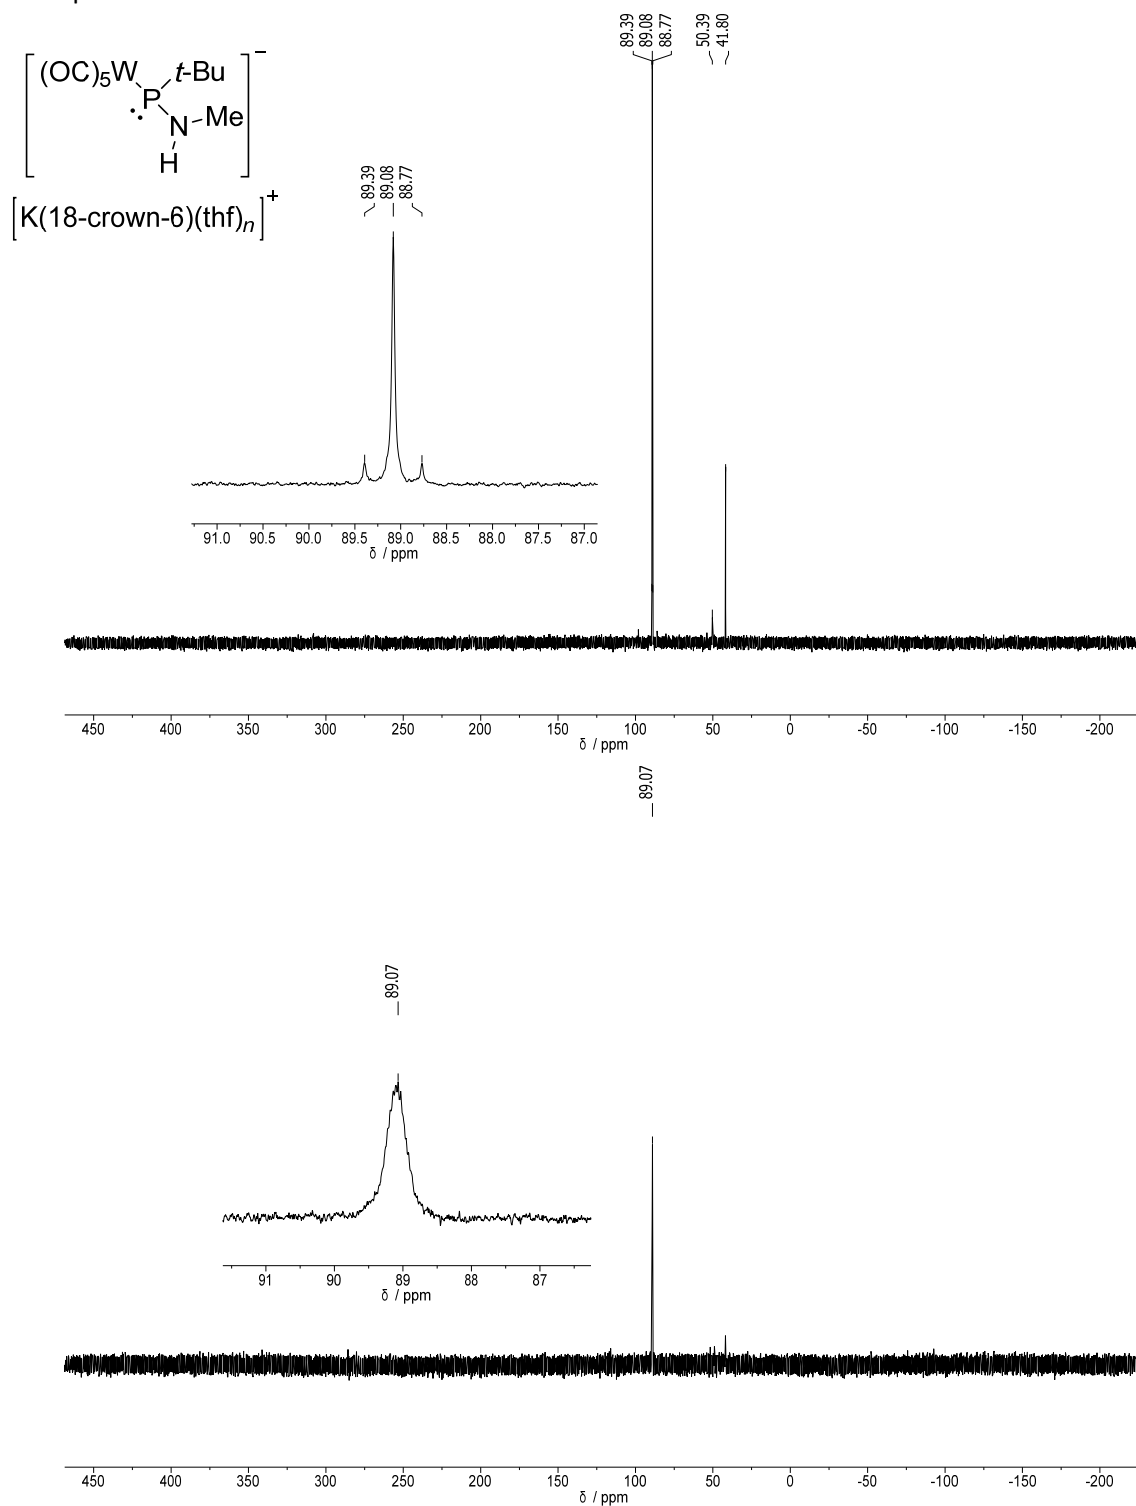

**Figure S9.**  $^{31}\text{P}\{^1\text{H}\}$  NMR (top) and  $^{31}\text{P}$  NMR (bottom) spectra of compound K-5b in reaction mixture in THF.

### 1.10 Complex **7b**

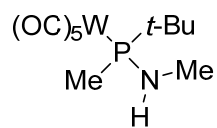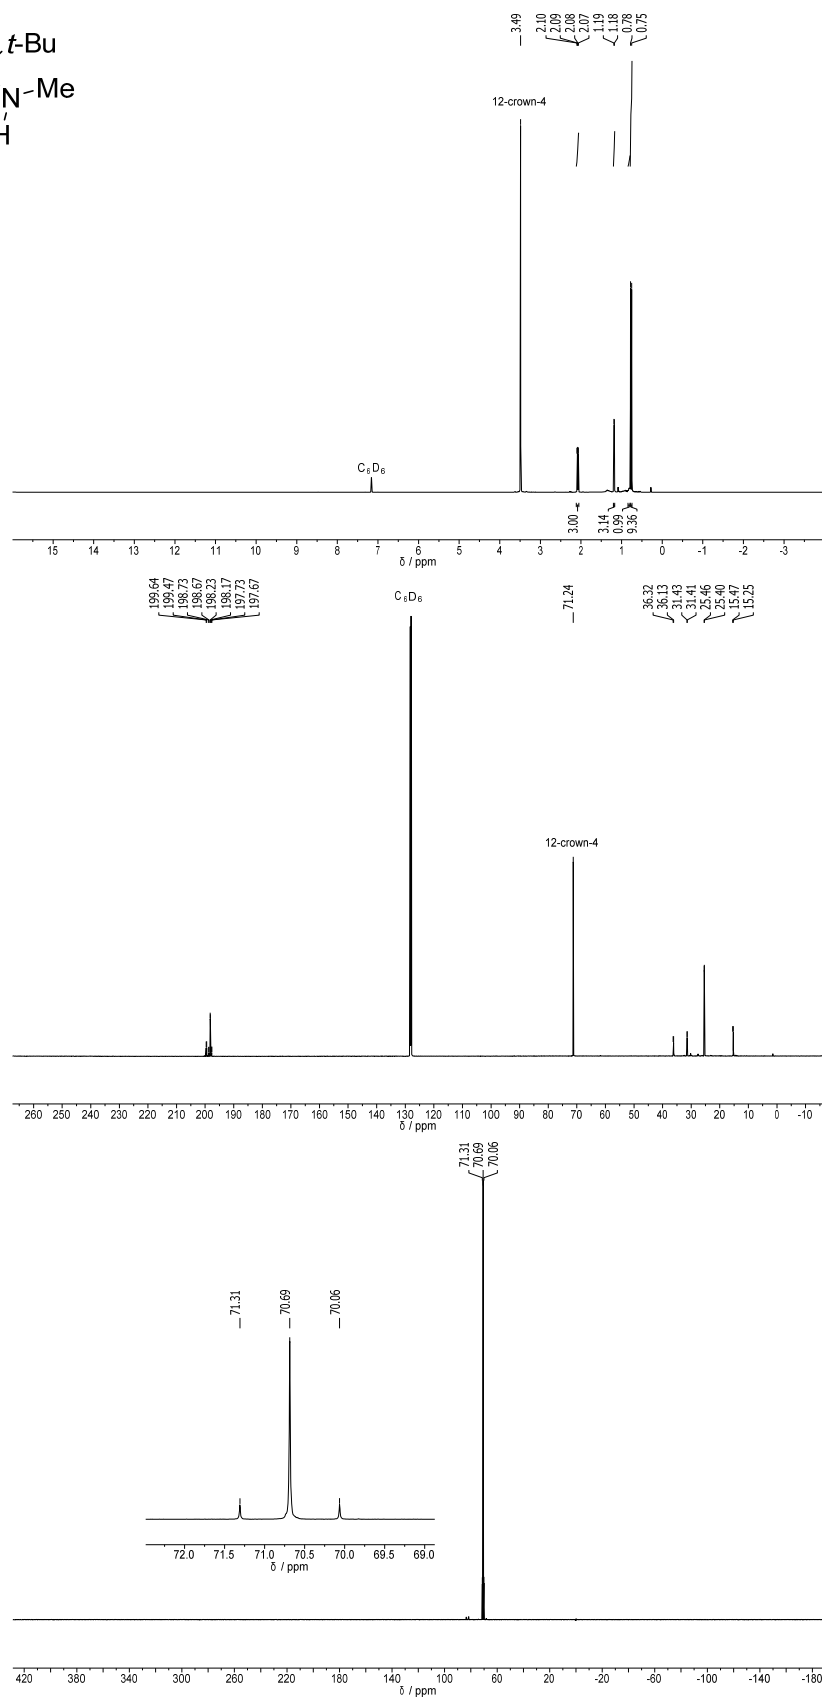

**Figure S10.**  $^1\text{H}$  NMR (top),  $^{13}\text{C}$  NMR (mid) and  $^{31}\text{P}\{^1\text{H}\}$  NMR (bottom) spectra of compound **7** in product mixture in  $\text{C}_6\text{D}_6$ .

## 2. Stacked NMR spectra of reaction monitoring

### 2.1 Decomposition of Li-5b

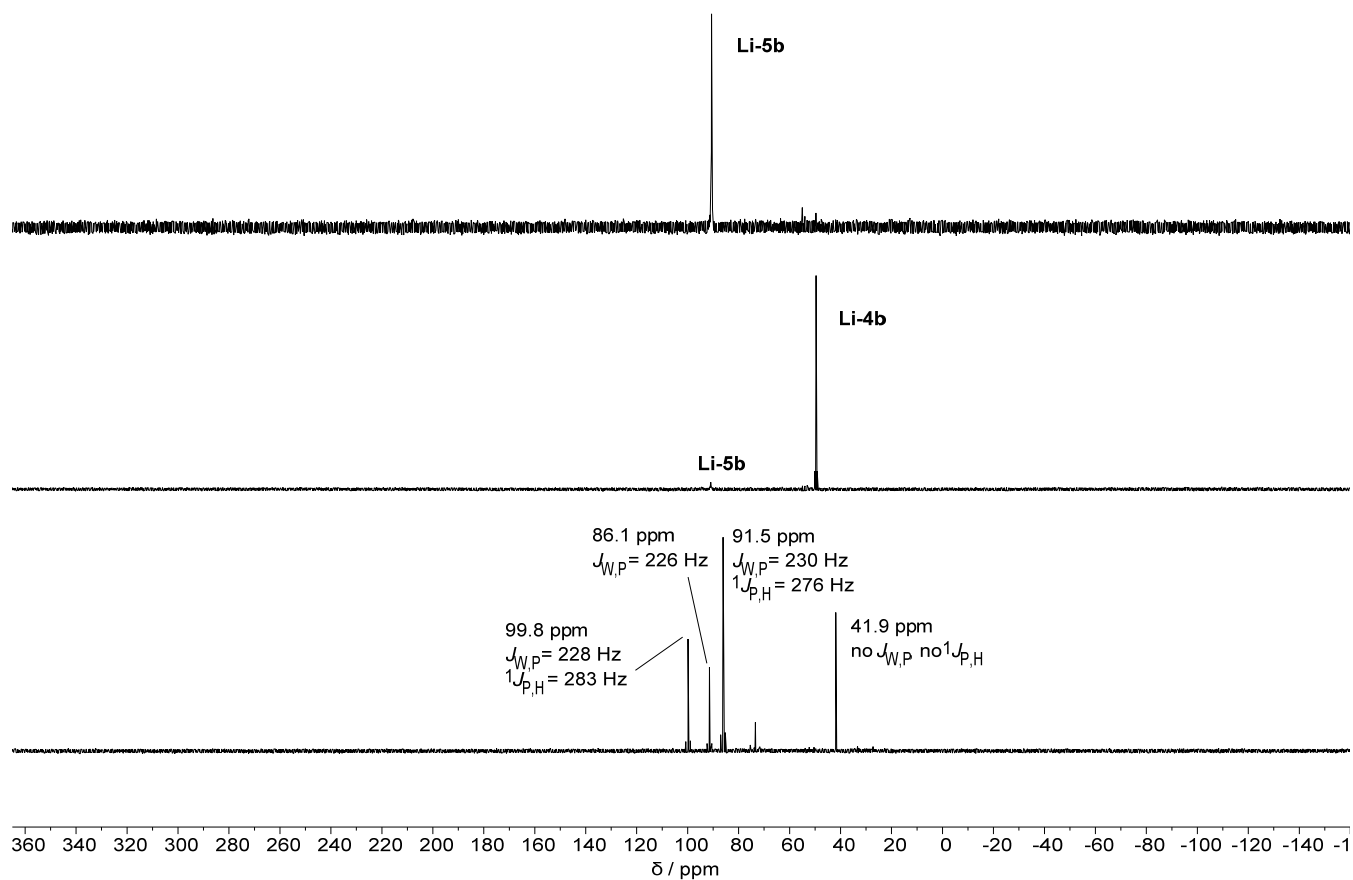

**Figure S11.** Decomposition of **Li-5b** in THF solution while warming up from -80 °C.

## 2.2 Reaction of **Li-5b** with MeI

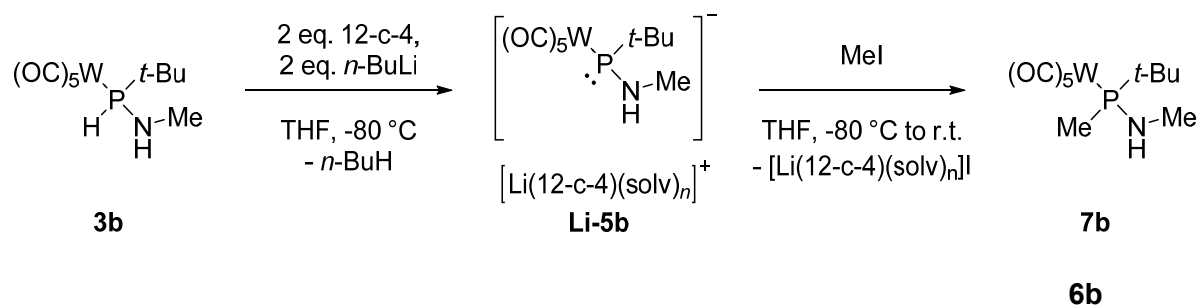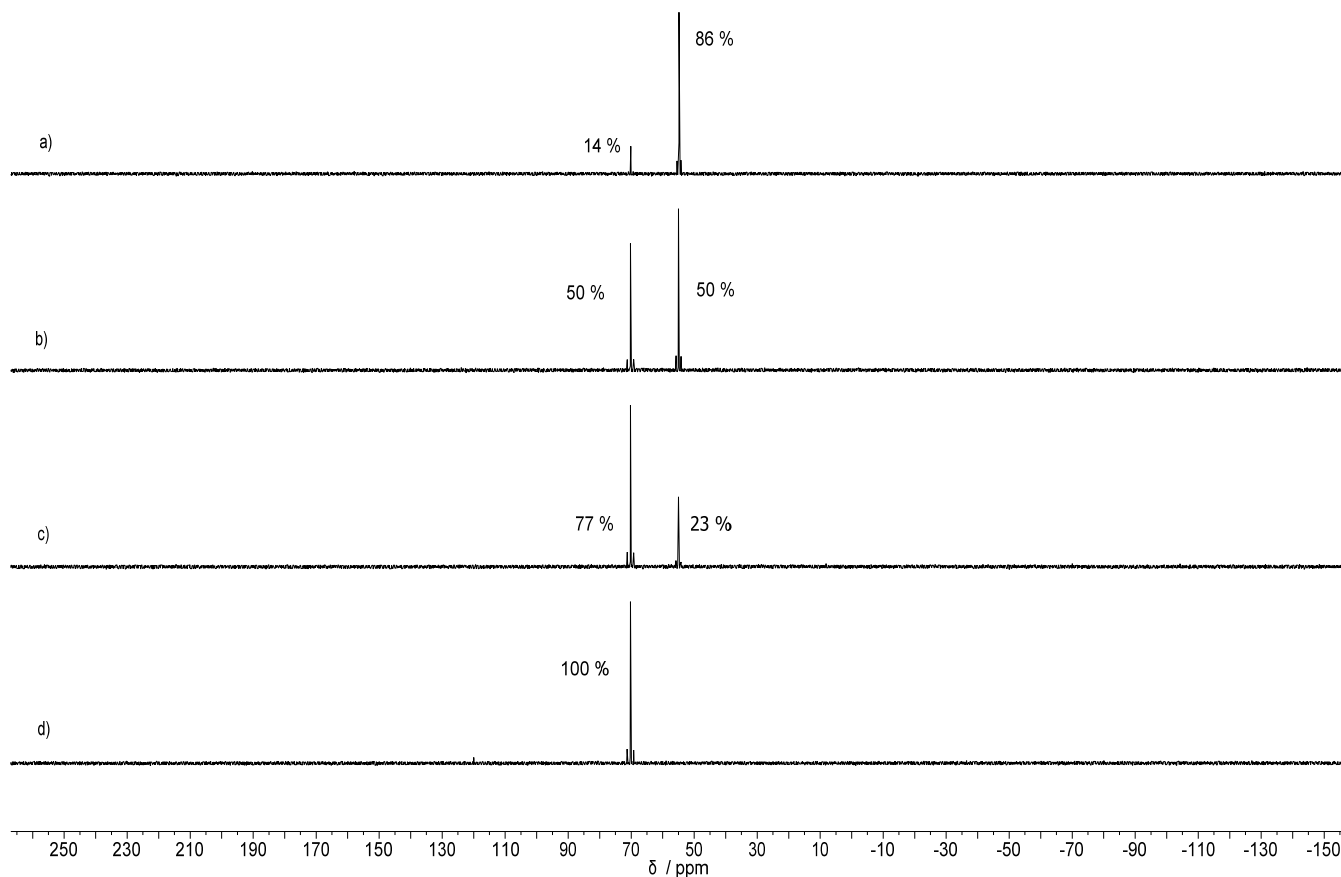

**Figure S12.** Reaction of **3b** with MeLi in presence of 12-crown-4 and *n*-BuLi, followed by treatment with MeI after a) 2 h, b) 3.5 h, c) 4.5 h, d) after removal of the THF; NMR spectra were measured at 298 K.

### 3. Computational Part

#### Computed structures.

The TPSS-D3/def2-TZVP + CPCM optimized atomic Cartesian coordinates (in Å) with electronic energies (hartrees) at the PW6B95-D3/def2-QZVP + CPCM level, unless otherwise stated, in THF solution. Gibbs energy correction and zero point energy (hartrees) are given at the optimization level.

##### MeI

Energy = -337.877442400231

ZPE = 0.03604972

G<sub>corr</sub> = 0.01131705

|   |                   |                   |                   |
|---|-------------------|-------------------|-------------------|
| C | -2.19860185618582 | 0.79951920591875  | -0.00005077924849 |
| H | -1.81086493743841 | 1.26556178331201  | 0.90208991778410  |
| H | -1.81088258765711 | 1.26572535207774  | -0.90212062145789 |
| H | -3.28416115012322 | 0.74491460685609  | 0.00001744883588  |
| I | -1.47688946859543 | -1.24172094816460 | 0.00006403408641  |

##### MeLi

Energy = -47.525044632700

ZPE = 0.0313387

G<sub>corr</sub> = 0.00973460

|    |                   |                   |                   |
|----|-------------------|-------------------|-------------------|
| C  | -2.16609844279837 | 0.70589307792485  | -0.00069991632543 |
| H  | -1.83621144123252 | 1.29474255513530  | 0.87771025198534  |
| H  | -1.83696517959732 | 1.29689923136529  | -0.87786334719108 |
| H  | -3.27054378266101 | 0.79081748934174  | -0.00006927364667 |
| Li | -1.47158115371078 | -1.25435235376717 | 0.00092228517783  |

##### MeH

Energy = -40.585271166429

ZPE = 0.04405286

G<sub>corr</sub> = 0.02541858

|   |                   |                   |                   |
|---|-------------------|-------------------|-------------------|
| C | -2.11628830770084 | 0.56678908750223  | -0.00000648401542 |
| H | -1.75209648672109 | 1.08242026470679  | 0.89247696397568  |
| H | -1.75198611751084 | 1.08212378903304  | -0.89261385165813 |
| H | -3.20946312085268 | 0.56642140759829  | -0.00008606185686 |
| H | -1.75156596721456 | -0.46375454884033 | 0.00022943355475  |

##### THF

Energy = -232.847274153018

ZPE = 0.11451906

G<sub>corr</sub> = 0.08768055

|   |                   |                   |                   |
|---|-------------------|-------------------|-------------------|
| O | -0.35846877242579 | -1.45439597242257 | -0.55921119328542 |
| C | -0.53276952425428 | -0.69347131259984 | -1.78442256307928 |
| C | -1.63374123105372 | -1.40272356313895 | -2.57339010555809 |
| C | -2.49737397105338 | -1.99246283726605 | -1.44800557088542 |
| C | -1.43431748815173 | -2.42081055724627 | -0.43861564759112 |
| H | -0.82636534656677 | 0.33176731661497  | -1.52071654066627 |
| H | 0.42806263899053  | -0.66445268528296 | -2.30822756744036 |
| H | -2.18282927598127 | -0.71937823664880 | -3.22674023895395 |
| H | -1.20937882303094 | -2.20604313027904 | -3.18564044471993 |
| H | -3.14286973649645 | -1.21868279876499 | -1.01785457189181 |
| H | -3.12246058659162 | -2.82743288597772 | -1.77598675910722 |
| H | -1.78288435819143 | -2.40936018436984 | 0.59868724122909  |
| H | -1.04348163525938 | -3.42110504488082 | -0.67325831737847 |

##### 3b [W(CO)<sub>5</sub>P<sup>t</sup>Bu(H)NHMe]

Energy = -1230.724438825169

ZPE = 0.22484892

G<sub>corr</sub> = 0.17542362

|   |                   |                   |                   |
|---|-------------------|-------------------|-------------------|
| P | -1.56297966593033 | -0.36583870722497 | 0.42935206082393  |
| H | -1.50353932963800 | 0.25664868089089  | -0.83455084327756 |
| W | -0.68912651119695 | 1.10314076543470  | 2.32052188060560  |
| C | -0.06100677528319 | 2.38100298724488  | 0.83332883534148  |
| O | 0.30083479984720  | 3.07894364616094  | -0.01479389415493 |
| C | -2.55308032826987 | 1.98604557767230  | 2.32394811083713  |
| O | -3.58789024950780 | 2.50059081353832  | 2.34148169253075  |
| C | -0.10850037281078 | 2.40566769060072  | 3.75410555399943  |
| O | 0.21098472667454  | 3.16521302288431  | 4.57276016755150  |
| C | 1.19678805899805  | 0.28624832806248  | 2.38757432671109  |
| O | 2.27233239681412  | -0.13365251859182 | 2.47796828940210  |
| C | -1.25651115500320 | -0.26984639802808 | 3.74503351925131  |
| O | -1.54187602405635 | -1.04635455454609 | 4.55494267787472  |
| C | -0.64941762998425 | -1.94020462312472 | -0.01324298088172 |
| C | 0.69111183718518  | -1.51499530959290 | -0.63571844170795 |
| H | 0.53543208368371  | -0.95001797458833 | -1.56127005810026 |
| H | 1.28051498084383  | -0.89859607855875 | 0.04912825157901  |
| H | 1.27973517220036  | -2.40847527499708 | -0.87520405882193 |
| C | -0.42269618209160 | -2.78233343055821 | 1.25118490640191  |
| H | 0.17272100673282  | -2.23823401903593 | 1.99034527890249  |
| H | -1.37109052196270 | -3.06800621955077 | 1.71829959302640  |
| H | 0.11497262615534  | -3.70110906560711 | 0.98855676579656  |
| C | -1.47658222028166 | -2.72964526920906 | -1.04049391507242 |
| H | -1.69106413741327 | -2.12662771603818 | -1.93027547284152 |
| H | -0.91084132549309 | -3.61358934639386 | -1.35855508978217 |
| H | -2.42447650369795 | -3.07347977324247 | -0.61403331668390 |
| C | -3.91139338145810 | -1.14629127841142 | 1.67656320444226  |
| H | -4.98524404464910 | -0.97227398681793 | 1.57038850018661  |
| H | -3.74098108944048 | -2.21610087190633 | 1.85262941895970  |
| H | -3.55859840172520 | -0.59018810132088 | 2.54725946166442  |
| N | -3.23300665890992 | -0.63598908131838 | 0.47793189482024  |
| H | -3.61292518033136 | -1.02615191382626 | -0.38136631938428 |

**3f** [W(CO)<sub>5</sub>P<sup>t</sup>Bu(H)NMe<sub>2</sub>]

Energy = -1270.093546820719

ZPE = 0.25192135

G<sub>corr</sub> = 0.20051301

|   |                   |                   |                   |
|---|-------------------|-------------------|-------------------|
| P | -1.66044959797431 | -0.25663359161204 | 0.38656493521973  |
| H | -1.60917916101313 | 0.33220587715092  | -0.89347696454714 |
| W | -0.65797228873910 | 1.33894509647060  | 2.11469183204155  |
| C | 0.47224630652450  | 2.02539409635904  | 0.53676946131052  |
| O | 1.11569401509413  | 2.40441368133005  | -0.34677070422995 |
| C | -2.23166346786943 | 2.55876136428698  | 1.58879464481492  |
| O | -3.12122264774493 | 3.24168238577934  | 1.30433250682731  |
| C | 0.08814908288851  | 2.80357484817565  | 3.28923844057997  |
| O | 0.51452264886820  | 3.66245745665076  | 3.94541596673276  |
| C | 0.88515400775400  | 0.11368989752912  | 2.70929432510882  |
| O | 1.75898249037960  | -0.54286691593253 | 3.09176864292101  |
| C | -1.71921120173373 | 0.61371596317223  | 3.72264358418037  |
| O | -2.26929876699293 | 0.22663947631351  | 4.66491163038934  |
| C | -0.80431229932799 | -1.86859815840444 | -0.01218713020712 |
| C | 0.63805324473456  | -1.53006736684264 | -0.41965057618628 |
| H | 0.65943669881217  | -0.88308010317031 | -1.30387111730596 |
| H | 1.18256001099196  | -1.03029216223498 | 0.38623395501873  |
| H | 1.17096575915788  | -2.45664773844800 | -0.66323352090803 |
| C | -0.83441065301438 | -2.76344175532275 | 1.23579341877245  |
| H | -0.35597824797158 | -2.27587348977722 | 2.09108663293483  |



|   |                   |                   |                   |
|---|-------------------|-------------------|-------------------|
| H | -1.86384212849020 | -3.01625492331308 | 1.51150091784562  |
| H | -0.29886908231326 | -3.69775817120669 | 1.03066515166622  |
| C | -1.53950577961657 | -2.54998288677639 | -1.17628295232468 |
| H | -1.51380910176222 | -1.93000089747029 | -2.07931470391581 |
| H | -1.05150912250585 | -3.50544253937538 | -1.40389768125830 |
| H | -2.58358441613017 | -2.74824094080185 | -0.91656986805849 |
| C | -4.20702077523612 | -0.17594972177316 | -0.63304072681939 |
| H | -5.03766546740733 | -0.88651730108772 | -0.71332459735846 |
| H | -4.62241920999894 | 0.82740272637173  | -0.45537911391684 |
| H | -3.66239169648104 | -0.17058777782103 | -1.57865779293395 |
| N | -3.31875635818766 | -0.59792164466316 | 0.45488772114200  |
| C | -3.98006897535929 | -0.69489535763939 | 1.75653883105766  |
| H | -3.31001050871815 | -1.15088217436727 | 2.48619147135065  |
| H | -4.30591686159982 | 0.28601584469634  | 2.13497195532211  |
| H | -4.86019644901744 | -1.33886309624596 | 1.65486142473385  |

**4b<sup>-</sup>** [W(CO)<sub>5</sub>P<sup>t</sup>Bu(H)NMe)]

Energy = -1230.205104243794

ZPE = 0.20977607

G<sub>corr</sub> = 0.16125875

|   |                   |                   |                   |
|---|-------------------|-------------------|-------------------|
| P | -1.73074995712985 | -0.32088654234966 | 0.46015182291067  |
| H | -1.64035780894529 | 0.31076199603551  | -0.83524967366870 |
| W | -0.64726768718720 | 1.15753469773759  | 2.27245027359190  |
| C | 0.26633328201587  | 2.16196878543680  | 0.74039545803197  |
| O | 0.77593072775117  | 2.68676003538421  | -0.16298052644912 |
| C | -2.38187120690281 | 2.23871274326141  | 1.98765866571828  |
| O | -3.34372565674915 | 2.86655339253573  | 1.84393489899152  |
| C | -0.06486115218999 | 2.46086073752443  | 3.69128666745612  |
| O | 0.25736675704429  | 3.22904847698517  | 4.51223393900891  |
| C | 1.08422788622555  | 0.11671449634605  | 2.60493654635025  |
| O | 2.08462687306245  | -0.43083087516436 | 2.83695282293249  |
| C | -1.62092032367671 | -0.11381852746218 | 3.56578630622467  |
| O | -2.15534072037358 | -0.85656637645094 | 4.27761313840892  |
| C | -0.71975549640728 | -1.84080711942418 | -0.05557507855745 |
| C | 0.63102385491733  | -1.36022300189710 | -0.59839857532298 |
| H | 0.49410069365509  | -0.71750944409814 | -1.47654478563470 |
| H | 1.18610639625366  | -0.79173082030309 | 0.15423768305606  |
| H | 1.24624695095015  | -2.21919720985373 | -0.89931550420510 |
| C | -0.53546748182697 | -2.74940968061563 | 1.16542518747488  |
| H | 0.03655971083519  | -2.24627681219683 | 1.95129551693636  |
| H | -1.50767198050533 | -3.03445155930287 | 1.58359968599680  |
| H | 0.00095203495657  | -3.66552060254507 | 0.88373131262476  |
| C | -1.48083898420607 | -2.59737392696512 | -1.15606739733138 |
| H | -1.69806385160593 | -1.94530151799118 | -2.01030615085714 |
| H | -0.87546352464410 | -3.44096042406345 | -1.51685797675306 |
| H | -2.42680148310032 | -2.99521948451107 | -0.77812020079562 |
| N | -3.28499456011247 | -0.56895217110345 | 0.80748488367917  |
| C | -4.21697452184365 | -0.89233087638537 | -0.26770965588436 |
| H | -5.21206446835089 | -0.48714789303988 | -0.02653067403422 |
| H | -3.92316742876513 | -0.46607356286886 | -1.24797283034811 |
| H | -4.35361687314460 | -1.97652693265471 | -0.43094577955179 |

**Li(thf)-4b** [Li(thf)]<sup>+</sup> [W(CO)<sub>5</sub>P<sup>t</sup>Bu(H)NMe)]<sup>-</sup>

Energy = -1470.58893575999

ZPE = 0.32989544

G<sub>corr</sub> = 0.27186468

|   |                   |                   |                  |
|---|-------------------|-------------------|------------------|
| P | -2.35627995984294 | -1.27940283339952 | 0.29818993473244 |
| H | -2.72622898305398 | 0.07432922824869  | 0.10428719570885 |
| W | -1.42175779953301 | -1.58658036585914 | 2.70297212496117 |

|    |                   |                   |                   |
|----|-------------------|-------------------|-------------------|
| C  | -1.50788197060827 | 0.46104324909788  | 2.75442250083363  |
| O  | -1.54393646623093 | 1.62124294599877  | 2.73995913789644  |
| C  | -3.39544227749865 | -1.74913964124273 | 3.26313892940252  |
| O  | -4.49696089356120 | -1.84267097979633 | 3.61097852611841  |
| C  | -0.90559279584120 | -1.73063474272308 | 4.64362388782760  |
| O  | -0.62059035651227 | -1.80284981155906 | 5.77188046234018  |
| C  | 0.57879630222894  | -1.47434868856984 | 2.25305792999548  |
| O  | 1.72422783441827  | -1.43298515587053 | 2.07127931401602  |
| C  | -1.27096581817571 | -3.61751173560439 | 2.40822363565197  |
| O  | -1.13188518408108 | -4.75631498649691 | 2.23616946006925  |
| C  | -1.08739673299597 | -1.31656246503146 | -1.09763646024552 |
| C  | -0.12871955217961 | -0.13492678910175 | -0.90180125075364 |
| H  | -0.66531631636642 | 0.81944900300352  | -0.96052640383901 |
| H  | 0.37880271463863  | -0.18035818675113 | 0.06582354387955  |
| H  | 0.63837732916459  | -0.14147431316785 | -1.68653151672999 |
| C  | -0.33256074509316 | -2.65236104187042 | -1.06958880697703 |
| H  | 0.19642980910685  | -2.78829771472454 | -0.12102360803161 |
| H  | -1.01887489927640 | -3.49618768529647 | -1.20039352954899 |
| H  | 0.40531704349964  | -2.68549333164630 | -1.88128140282629 |
| C  | -1.84181094907984 | -1.16029261503863 | -2.42637948368041 |
| H  | -2.37964813899739 | -0.20482289242278 | -2.46359997287557 |
| H  | -1.13121412927033 | -1.18209533647805 | -3.26285422908049 |
| H  | -2.56989041567819 | -1.96592201294105 | -2.55957134653999 |
| C  | -3.90870283609192 | -3.44659059739523 | 0.29186385835243  |
| H  | -4.96743203903794 | -3.72571731169720 | 0.20948059078616  |
| H  | -3.33868884214935 | -4.15149485399259 | -0.33537860220777 |
| H  | -3.60556362115988 | -3.63205602279473 | 1.33610795953796  |
| N  | -3.74420842443578 | -2.04952970558274 | -0.10068525260250 |
| Li | -5.20520519283181 | -0.96278615134453 | -0.62175991167899 |
| O  | -5.36136608175200 | 0.86017596236138  | -0.06840170897723 |
| C  | -5.20964918035335 | 1.14248264474509  | 1.36208200447469  |
| C  | -4.84541929446560 | 1.98691064078842  | -0.84603087806420 |
| C  | -4.83125703629084 | 2.61652890847725  | 1.44906725080783  |
| H  | -6.15525711769095 | 0.89439902083389  | 1.84956950284606  |
| H  | -4.41745895686054 | 0.49201193138391  | 1.74918751447845  |
| C  | -4.05045483130743 | 2.83045463931546  | 0.14317537896460  |
| H  | -4.24628642194478 | 1.57927814133802  | -1.66474234733801 |
| H  | -5.70011732821341 | 2.53584490941529  | -1.25733207258377 |
| H  | -4.23790261736514 | 2.83226497297583  | 2.34033544696526  |
| H  | -5.72929707640149 | 3.24263173854294  | 1.46370598920705  |
| H  | -3.03048599574499 | 2.44516952003673  | 0.24217153052941  |
| H  | -4.00034375508315 | 3.87919051183593  | -0.15923482580248 |

**Li(thf)<sub>2</sub>-4b** [Li(thf)<sub>2</sub>]<sup>+</sup> [W(CO)<sub>5</sub>P<sup>t</sup>Bu(H)NMe)]<sup>-</sup>

Energy = -1703.45228371707

ZPE = 0.44680840

G<sub>corr</sub> = 0.38072176

|   |                   |                   |                   |
|---|-------------------|-------------------|-------------------|
| P | 0.05906036772475  | -0.00018802469810 | -0.07263127366907 |
| H | 1.48940816168955  | 0.04347659129143  | -0.10465782899764 |
| W | -0.90432439023276 | 2.38987880502197  | -0.04863948328969 |
| C | 0.11239227987261  | 2.51987771738889  | -1.83352864704726 |
| O | 0.72579548947782  | 2.62464464730792  | -2.80997643352551 |
| C | -2.54077635875854 | 1.47246067663059  | -0.84863163474311 |
| O | -3.44269553708238 | 0.86999058252649  | -1.27708788249777 |
| C | -1.59442439638241 | 4.26715222393648  | -0.32758548869299 |
| O | -1.99180986759137 | 5.34540849652764  | -0.52058503165052 |
| C | 0.82454674901957  | 2.98336925147624  | 0.89696417639515  |
| O | 1.80417834532679  | 3.27219740055818  | 1.44338920427224  |
| C | -1.83706340341195 | 2.37934753510877  | 1.78210844349549  |

|    |                   |                   |                   |
|----|-------------------|-------------------|-------------------|
| O  | -2.36537209540301 | 2.44297346073736  | 2.81329120860461  |
| C  | -0.06625909836761 | -0.94594530451173 | 1.55516979255396  |
| C  | 0.63900536185912  | -0.12458049470742 | 2.64198169922569  |
| H  | 1.69317610727935  | 0.04326025386920  | 2.39162886557260  |
| H  | 0.16055129361787  | 0.85004542276900  | 2.78005836951357  |
| H  | 0.59893465868541  | -0.66036420918878 | 3.59906653261929  |
| C  | -1.54694082717427 | -1.14815567930284 | 1.89867084271847  |
| H  | -2.05491351110806 | -0.19183026154018 | 2.05135044271467  |
| H  | -2.06297728352259 | -1.68154694709417 | 1.09420192344873  |
| H  | -1.64528330706758 | -1.73863979305381 | 2.81841642479749  |
| C  | 0.62443156898344  | -2.31034128656681 | 1.39872509414174  |
| H  | 1.66962215796659  | -2.19707917763471 | 1.08928539690226  |
| H  | 0.60839715631902  | -2.84550174148545 | 2.35751492741862  |
| H  | 0.11091830597567  | -2.92930039049271 | 0.65737856561003  |
| C  | 0.49544019355055  | -1.87649991900570 | -1.91426980032108 |
| H  | 0.40628775357100  | -1.92262743984541 | -3.00953249610557 |
| H  | 1.55442133164302  | -1.67397548794475 | -1.68121959277581 |
| H  | 0.27341306114090  | -2.88704758649736 | -1.53342781594050 |
| N  | -0.40321192364111 | -0.83825102525119 | -1.39182610299684 |
| Li | -2.11531647915499 | -0.98139738173738 | -2.25592481356971 |
| O  | -2.38014342627081 | -0.33843993439008 | -4.05032332184891 |
| C  | -3.68040067808189 | -0.01810227318545 | -4.61594114592637 |
| H  | -3.79542274727883 | -0.57450531574810 | -5.55360876709528 |
| H  | -4.43234558080732 | -0.35498147461484 | -3.90022169714248 |
| C  | -3.67763803041017 | 1.50626783931475  | -4.85542327460709 |
| H  | -4.34989671438928 | 2.01854937975351  | -4.16383954423049 |
| H  | -4.00138008720503 | 1.73164687720710  | -5.87443344560451 |
| C  | -2.20568517128159 | 1.93275494208327  | -4.61915024033832 |
| H  | -1.83963946785818 | 2.62069926886798  | -5.38497383311694 |
| H  | -2.10119650624361 | 2.41725385130890  | -3.64509558919030 |
| C  | -1.44526950113335 | 0.60897078063847  | -4.62713948198677 |
| H  | -0.55146472134173 | 0.58788354638930  | -4.00294531964624 |
| H  | -1.19913223421172 | 0.28698325507787  | -5.64771167063894 |
| O  | -3.08727377016280 | -2.64562241928359 | -2.15094166464264 |
| C  | -3.24801795765751 | -3.48878800006745 | -3.33319841107374 |
| H  | -4.31765693049423 | -3.56293481178318 | -3.56488486019338 |
| H  | -2.72849804873532 | -2.99524928364515 | -4.15672226063278 |
| C  | -2.66288422084287 | -4.83599755789769 | -2.93433326300601 |
| H  | -1.57144509809923 | -4.81679638078296 | -3.02464600724974 |
| H  | -3.05245335109778 | -5.65463814960186 | -3.54459611297745 |
| C  | -3.08290306893628 | -4.93347121976651 | -1.45954271020310 |
| H  | -2.47110109579842 | -5.63172724452863 | -0.88343997510765 |
| H  | -4.13022052091519 | -5.24361773041224 | -1.38495411858326 |
| C  | -2.91456991127680 | -3.49540175977026 | -0.97080194752188 |
| H  | -1.91034215038552 | -3.30643199703000 | -0.57822891259487 |
| H  | -3.65813244388872 | -3.19561792272472 | -0.22772250902219 |

**5b<sup>-</sup>** [W(CO)<sub>5</sub>P<sup>t</sup>BuNHMe]]

Energy = -1230.218241498138

ZPE = 0.21335403

G<sub>corr</sub> = 0.16403998

|   |                   |                   |                   |
|---|-------------------|-------------------|-------------------|
| P | -1.69236334515294 | -0.37430088878824 | -0.03038400205173 |
| W | -0.84610100521498 | 1.23756659205170  | 1.97347611881966  |
| C | 0.31102997630618  | 1.98761180078993  | 0.46358522025174  |
| O | 0.94177059284803  | 2.34362868051977  | -0.44811286089964 |
| C | -2.39169597826358 | 2.47427404194880  | 1.42145593300034  |
| O | -3.23286787536354 | 3.22670986429404  | 1.13941646646696  |
| C | -0.38328616626413 | 2.57905501190813  | 3.38192468838432  |
| O | -0.12471842837275 | 3.35904151855640  | 4.21937416690488  |

|   |                   |                   |                   |
|---|-------------------|-------------------|-------------------|
| C | 0.75627304116904  | 0.14861010208165  | 2.64282057877405  |
| O | 1.67890363365390  | -0.41029786813207 | 3.08280408918605  |
| C | -2.09540691332115 | 0.03829164876810  | 3.04711977930053  |
| O | -2.81968731180515 | -0.72187198044493 | 3.55573447947479  |
| C | -0.58779687796759 | -1.91114552711556 | -0.14928442034732 |
| C | 0.83146503586434  | -1.43328221530398 | -0.48589558866424 |
| H | 0.83208968959609  | -0.81777259458773 | -1.39353206589373 |
| H | 1.25747718047547  | -0.83873997570380 | 0.32694610399596  |
| H | 1.48594901772509  | -2.29826038825694 | -0.65821998847830 |
| C | -0.57602930406787 | -2.75277604332427 | 1.13347470772077  |
| H | -0.24472459038109 | -2.15969825846234 | 1.99042265898575  |
| H | -1.57171443503704 | -3.15313216176739 | 1.35586220881315  |
| H | 0.10522737609199  | -3.60847709055314 | 1.02025627699938  |
| C | -1.11548890162278 | -2.76739968510015 | -1.31686152860338 |
| H | -1.08792871997382 | -2.20513199192193 | -2.25709091333966 |
| H | -0.49298953648799 | -3.66598082667116 | -1.43331163550821 |
| H | -2.14796628782526 | -3.07909242796371 | -1.13218490879199 |
| C | -4.37913213389084 | -0.32221710077473 | 0.36649786466739  |
| H | -5.27763372988729 | -0.93498844282315 | 0.50282059075296  |
| H | -4.37680166506137 | 0.46207445571930  | 1.14080974299333  |
| H | -4.43391678294874 | 0.17045776874778  | -0.60994287910904 |
| N | -3.18912298747755 | -1.17912405474988 | 0.40064229315855  |
| H | -3.14751256734269 | -1.65823196294051 | 1.30087682303664  |

<sup>6</sup>Li(thf)<sub>2</sub>-5b [Li(thf)<sub>2</sub>]<sup>+</sup> [W(CO)<sub>5</sub>P<sup>t</sup>BuN(H)Me]<sup>-</sup>

Energy = -1703.44799381023

ZPE = 0.44930819

G<sub>corr</sub> = 0.38488838

|   |                   |                   |                   |
|---|-------------------|-------------------|-------------------|
| P | 0.68917863174184  | 0.21431913576777  | -0.00551754242327 |
| H | -0.21026304658251 | 0.73000599092965  | -2.02697119532280 |
| W | -0.64073330534535 | 2.42720903137695  | 0.62119986968514  |
| C | 0.00732011039259  | 3.15362776485300  | -1.18549702514702 |
| O | 0.35844087241452  | 3.59851683017026  | -2.19981479957508 |
| C | -2.17047350845349 | 1.43674697783923  | -0.24825960456940 |
| O | -2.97785156795729 | 0.76215644922139  | -0.77120955458748 |
| C | -1.57540905436025 | 4.18517169271473  | 0.90578479801245  |
| O | -2.14290712048253 | 5.19662591890377  | 1.04333642033210  |
| C | 1.15885401448874  | 2.94448125765176  | 1.48597890306413  |
| O | 2.19253362466724  | 3.15592308355671  | 1.96303379545646  |
| C | -1.32502647549924 | 1.87987167044558  | 2.48226096995990  |
| O | -1.74241790450403 | 1.64082587034633  | 3.53836625636594  |
| C | 0.14666057010868  | -1.24041231005751 | 1.08682565266332  |
| C | 0.80649346054396  | -0.95570371754301 | 2.44785310439290  |
| H | 1.89379544887659  | -0.86232017271873 | 2.34525357886778  |
| H | 0.42567964988388  | -0.03106779893690 | 2.89215584103430  |
| H | 0.59575202306572  | -1.78011357128213 | 3.14123504968757  |
| C | -1.36221939639264 | -1.42740549895672 | 1.26255885295972  |
| H | -1.82920039797053 | -0.54280860620745 | 1.70130485027170  |
| H | -1.84731254735547 | -1.63773832894184 | 0.30477256227314  |
| H | -1.56115460445597 | -2.28432638668891 | 1.92189786080132  |
| C | 0.74334117206590  | -2.54009967479575 | 0.51504370415218  |
| H | 1.81959930000443  | -2.44195917449780 | 0.33688457673883  |
| H | 0.58188044975037  | -3.36456483321313 | 1.22312146524785  |
| H | 0.26052990218304  | -2.81618825038348 | -0.42758225285984 |
| C | 0.88766007742106  | -0.89256342695589 | -2.54449237440325 |
| H | 0.42706544241731  | -0.95822505214524 | -3.53697351669545 |
| H | 1.85122322540708  | -0.37385700142277 | -2.62765187024582 |
| H | 1.07268528497026  | -1.90405760493008 | -2.18045627523963 |
| N | -0.04760543257500 | -0.19479264403426 | -1.62077499764107 |

|    |                   |                   |                   |
|----|-------------------|-------------------|-------------------|
| Li | -1.99352051238763 | -0.72456124268530 | -1.97628314032573 |
| O  | -2.33223602903023 | -0.00658407705375 | -3.72713681021353 |
| C  | -3.05626947138665 | -0.71106541772068 | -4.78230699623635 |
| H  | -2.62332126954265 | -1.71019691024220 | -4.87028687467257 |
| H  | -4.10698348731992 | -0.79259525534921 | -4.48075965040313 |
| C  | -2.88580693785035 | 0.15131907497118  | -6.02766951808841 |
| H  | -3.70620344310851 | 0.01515009107392  | -6.73641581784760 |
| H  | -1.94283418001888 | -0.08763388190417 | -6.53061789709121 |
| C  | -2.83197726724148 | 1.56745066102134  | -5.43370014669876 |
| H  | -2.36553578190695 | 2.29604283506088  | -6.10085020124497 |
| H  | -3.83946817694378 | 1.91438453746092  | -5.18197511645806 |
| C  | -2.01505338684641 | 1.35011791035979  | -4.16480859031087 |
| H  | -2.27445804280324 | 2.03327240782886  | -3.35208989820143 |
| H  | -0.93730974083437 | 1.40324306978182  | -4.36113746111030 |
| O  | -2.85103150158511 | -2.41179674503069 | -1.84402280244302 |
| C  | -2.24814020717881 | -3.70356440910855 | -2.14950710924652 |
| H  | -2.39087275826627 | -3.91263201563635 | -3.21681119706274 |
| H  | -1.18042766044481 | -3.62631231169264 | -1.93302745183255 |
| C  | -2.99680387834722 | -4.69685557066940 | -1.27341223525335 |
| H  | -2.59294012494624 | -4.68404181218891 | -0.25561069542300 |
| H  | -2.94122443725381 | -5.71609666846069 | -1.66295000790806 |
| C  | -4.42195387291465 | -4.12107431884647 | -1.29885029118734 |
| H  | -5.03469867191055 | -4.45813522391178 | -0.45968019367847 |
| H  | -4.92377068189362 | -4.39729077592164 | -2.23173436365266 |
| C  | -4.17536205318802 | -2.61389952424054 | -1.25080879690416 |
| H  | -4.13862460962749 | -2.23261938812951 | -0.22507615320499 |
| H  | -4.89579228368912 | -2.03180547883085 | -1.83128018655496 |

TS(4b<sup>-</sup>→5b<sup>-</sup>)

Energy = -1230.1170130699

ZPE = 0.20727689

G<sub>corr</sub> = 0.15795785

Imf = -1425.61 cm<sup>-1</sup>

|   |                   |                   |                   |
|---|-------------------|-------------------|-------------------|
| P | -1.62199534003794 | -0.16242527678598 | 0.28417017688118  |
| H | -2.83932183875783 | 0.50247534798897  | -0.25374351931267 |
| W | -0.57571598069852 | 1.23685208691059  | 2.19622856915836  |
| C | 0.49046995617497  | 2.26001877790566  | 0.77568188918146  |
| O | 1.09749267896493  | 2.80001147879721  | -0.05514652491572 |
| C | -2.24826691326720 | 2.40051076234833  | 1.87642597556434  |
| O | -3.17243097487748 | 3.08387556696080  | 1.72399009389658  |
| C | -0.02979449473439 | 2.45244466806110  | 3.69766933611024  |
| O | 0.26616540105647  | 3.15866051550749  | 4.58336632933849  |
| C | 1.07573622715683  | 0.09466669248535  | 2.58848819094211  |
| O | 2.02009429378371  | -0.52709505627355 | 2.86665103408945  |
| C | -1.65659854649658 | -0.02904972195162 | 3.40902248340811  |
| O | -2.23141228574815 | -0.78085982009443 | 4.07672315925731  |
| C | -0.70818210919174 | -1.77702935509568 | -0.16321296197394 |
| C | 0.73137429748896  | -1.40980554373586 | -0.54300493382893 |
| H | 0.74536571963975  | -0.75419115192257 | -1.42207956577834 |
| H | 1.24519410334071  | -0.89438609603048 | 0.27216988392488  |
| H | 1.29692373341481  | -2.31919939625910 | -0.78815190469007 |
| C | -0.76157991777481 | -2.67674406596464 | 1.07823394507414  |
| H | -0.14630337761317 | -2.27067083732732 | 1.88638406703746  |
| H | -1.79107657755163 | -2.76572419088271 | 1.44702712717223  |
| H | -0.39635752506660 | -3.68484119600425 | 0.83734036710330  |
| C | -1.36785612737642 | -2.47998246107243 | -1.36163284474358 |
| H | -1.45821372851788 | -1.80140592010432 | -2.21690039003481 |
| H | -0.74732497497933 | -3.33493822316960 | -1.66580116274515 |
| H | -2.36260819677822 | -2.85725546298414 | -1.11584125838189 |

|   |                   |                   |                   |
|---|-------------------|-------------------|-------------------|
| N | -3.28006169914366 | -0.44328171200093 | 0.83935177059358  |
| C | -4.14266098793943 | -1.21652294680488 | -0.06399347831888 |
| H | -5.18971852384090 | -0.93043386432769 | 0.11250607870682  |
| H | -3.93017588698474 | -1.06067240261199 | -1.14205279855685 |
| H | -4.06766040364406 | -2.30120119556104 | 0.11673086584048  |

TS(Li(thf)<sub>2</sub>-4b→<sup>N</sup>Li(thf)<sub>2</sub>-5b)

Energy = -1703.36133323089

ZPE = 0.44386542

G<sub>corr</sub> = 0.37752200

Imf = -1474.33 cm<sup>-1</sup>

|    |                   |                   |                   |
|----|-------------------|-------------------|-------------------|
| P  | 0.22930583945769  | 0.06681833124028  | -0.17750851407203 |
| H  | 0.80047188907339  | 0.11476213743389  | -1.56499052962310 |
| W  | -1.26806385486095 | 2.14400640508688  | 0.21134542314038  |
| C  | -0.28272158099215 | 2.86474457816210  | -1.42064279164414 |
| O  | 0.28032125352811  | 3.26152982117714  | -2.34885075997094 |
| C  | -2.64210743234238 | 1.30770585276440  | -0.97313961198975 |
| O  | -3.40247945931195 | 0.76437285620695  | -1.67552182215387 |
| C  | -2.30554698095706 | 3.84232884922229  | 0.37054064567784  |
| O  | -2.92326844283976 | 4.82358485242445  | 0.44642945067267  |
| C  | 0.22779541236812  | 2.85394413160424  | 1.42869689009711  |
| O  | 1.07014881065455  | 3.25318779651485  | 2.10757137827385  |
| C  | -2.26918840524218 | 1.39785844102101  | 1.81767692370471  |
| O  | -2.88711714302905 | 1.00382609299936  | 2.71401038474687  |
| C  | 0.41616128701945  | -1.16218100893223 | 1.27188581193455  |
| C  | 0.68293250986016  | -0.36481046651899 | 2.53974777339332  |
| H  | 1.58705397681954  | 0.23585655520096  | 2.44639851489560  |
| H  | -0.13757752080682 | 0.29944991696207  | 2.79048450023803  |
| H  | 0.82614073983345  | -1.04751479911668 | 3.37955356533968  |
| C  | -0.88755689253687 | -1.93812856900385 | 1.36400204100055  |
| H  | -1.72273576756997 | -1.29268918095897 | 1.62375687885568  |
| H  | -1.12206161342904 | -2.42555967102183 | 0.41902256954493  |
| H  | -0.81351889057472 | -2.71360406157241 | 2.12937179280780  |
| C  | 1.59175897233158  | -2.10681345795629 | 1.03664539088653  |
| H  | 2.51370411183000  | -1.55452212622171 | 0.86483632124712  |
| H  | 1.73582374966124  | -2.73342935545252 | 1.92010542969211  |
| H  | 1.43123955338611  | -2.76663733328211 | 0.19105795237640  |
| C  | 0.44955263515586  | -1.92204755603343 | -2.09446870346364 |
| H  | 0.30845877816958  | -2.06215442812556 | -3.17000028080982 |
| H  | 1.53025313385622  | -1.80244253015910 | -1.92577768335135 |
| H  | 0.16217439665791  | -2.86029573206152 | -1.60928231422910 |
| N  | -0.34785245732266 | -0.78300885352375 | -1.65165887458053 |
| Li | -2.10001463441209 | -0.82169188827594 | -2.52926874884756 |
| O  | -2.01305716829375 | -0.36141482606492 | -4.43278865512614 |
| C  | -3.21925609412865 | -0.12925254229309 | -5.18447419608431 |
| H  | -3.08662887567965 | -0.53209017649620 | -6.19135017845707 |
| H  | -4.01881300352200 | -0.67401737106727 | -4.69047179795774 |
| C  | -3.41067238833689 | 1.38764870976640  | -5.20899692899674 |
| H  | -4.16451150668055 | 1.69687729329894  | -4.49015890088448 |
| H  | -3.73389622276431 | 1.72034435017893  | -6.19243016518931 |
| C  | -2.02814196791631 | 1.95240741708254  | -4.82778614077281 |
| H  | -1.66079151571408 | 2.68483860822541  | -5.54210720021396 |
| H  | -2.06790488778090 | 2.43345811950295  | -3.85457785263449 |
| C  | -1.13082129573402 | 0.72609671549476  | -4.77372010844791 |
| H  | -0.35848889489073 | 0.76222429740101  | -4.01138317282133 |
| H  | -0.67262123997614 | 0.51857003948860  | -5.74415799966915 |
| O  | -3.35050630197520 | -2.32907021429395 | -2.32307001373313 |
| C  | -2.96699541534345 | -3.62424386282541 | -2.82988479066026 |
| H  | -3.76551620743377 | -4.01311938835640 | -3.46681369544084 |

|   |                   |                   |                   |
|---|-------------------|-------------------|-------------------|
| H | -2.07153022286579 | -3.49244307131166 | -3.43278386589121 |
| C | -2.77201819492434 | -4.48090318079980 | -1.59992959517638 |
| H | -1.79480662503728 | -4.28660145078021 | -1.15978449815835 |
| H | -2.84380571208305 | -5.54405935748694 | -1.81655620734959 |
| C | -3.88849449893558 | -3.98064748326369 | -0.68812059085632 |
| H | -3.67969862115307 | -4.14410189015518 | 0.36600978955895  |
| H | -4.82336798571653 | -4.48496203107023 | -0.92769759816186 |
| C | -3.98123612599923 | -2.49731470100962 | -1.02468010435491 |
| H | -3.43780697573165 | -1.87762139515623 | -0.31383137897414 |
| H | -5.00659959481635 | -2.13755102781176 | -1.08562565733455 |

TS(Li(thf)<sub>2</sub>-4b→<sup>N</sup>Li(thf)<sub>2</sub>-5b)-THF

Energy = -1936.21632924166

ZPE = 0.55879111

G<sub>corr</sub> = 0.4860187

Imf = -1443.75 cm<sup>-1</sup>

|    |                   |                   |                   |
|----|-------------------|-------------------|-------------------|
| P  | -0.20311386396571 | 0.16957885526325  | 0.11321555512377  |
| H  | -0.12620236285712 | -0.41541638119942 | 1.49187635740617  |
| W  | 2.11164107994530  | 0.16144792828982  | -1.08724418916302 |
| C  | 2.98843093364526  | -0.43268583607005 | 0.67472591002997  |
| O  | 3.56743658347158  | -0.78266737408740 | 1.61619008017148  |
| C  | 1.69960065556237  | -1.78307981014192 | -1.47994408194313 |
| O  | 1.39194752839735  | -2.90212766429948 | -1.61215137036048 |
| C  | 3.96112589745457  | 0.12691845800182  | -1.88051258246267 |
| O  | 5.03179863393759  | 0.08051417198463  | -2.34116480085656 |
| C  | 2.21428217628347  | 2.14259124399235  | -0.51197924465839 |
| O  | 2.23355112524349  | 3.24715064012892  | -0.16732715175141 |
| C  | 1.45202665302648  | 0.67951982738214  | -2.96443026785631 |
| O  | 1.16346551042013  | 0.93684426325924  | -4.05834286894984 |
| C  | -1.64365982624686 | 0.89535539690858  | -0.89429450026796 |
| C  | -1.20057222284392 | 2.26357285759380  | -1.43010816393211 |
| H  | -0.96777820926410 | 2.94824960391539  | -0.60629657620212 |
| H  | -0.31804507634513 | 2.18715203994602  | -2.06916304329833 |
| H  | -2.01380639509801 | 2.70653259243008  | -2.01944898449207 |
| C  | -1.93625055291328 | -0.09518115358127 | -2.02876873409006 |
| H  | -1.10002239973413 | -0.15384619446664 | -2.73119424470828 |
| H  | -2.11432982090576 | -1.10062909489754 | -1.62901038536908 |
| H  | -2.83196989577874 | 0.21623560147775  | -2.58244414196088 |
| C  | -2.89752194412599 | 1.10637304325345  | -0.02656599938248 |
| H  | -2.66470765687434 | 1.69587142438378  | 0.86637840014639  |
| H  | -3.64804459658306 | 1.65364189575819  | -0.61300355021109 |
| H  | -3.34396586706918 | 0.16207842013005  | 0.28905551068106  |
| C  | -1.85707103947734 | -1.67530542970984 | 1.35689095355603  |
| H  | -1.77113614529518 | -2.53817453866973 | 2.03191915856275  |
| H  | -2.12771402739021 | -0.79776391986510 | 1.97142587043403  |
| H  | -2.70231846699305 | -1.86843239827600 | 0.68066792444792  |
| N  | -0.59106087517351 | -1.50391329160382 | 0.62657015396923  |
| Li | 0.36838231633955  | -3.16889703219909 | 0.38191146025031  |
| O  | 1.61311105425145  | -3.58638486550880 | 1.75883623267001  |
| C  | 2.75712729947208  | -4.48625918677501 | 1.69911499630653  |
| H  | 2.45828715764131  | -5.36196234830681 | 1.11711226439403  |
| H  | 3.57732237404899  | -3.96877910780219 | 1.18706409904236  |
| C  | 3.10034454175836  | -4.79003472840501 | 3.15286573420749  |
| H  | 4.14877752674517  | -5.07181083186217 | 3.27793416960624  |
| H  | 2.46998206212150  | -5.60219507681473 | 3.53074913724778  |
| C  | 2.74519271682791  | -3.46528281128369 | 3.84690638142048  |
| H  | 2.57062876083653  | -3.57606245736977 | 4.91966400159061  |
| H  | 3.54218506475404  | -2.73114877973905 | 3.69571377656872  |
| C  | 1.48271923468634  | -3.03525387959345 | 3.10720291643079  |

|   |                   |                   |                   |
|---|-------------------|-------------------|-------------------|
| H | 1.36933386426294  | -1.95461626026775 | 3.02082770598832  |
| H | 0.57880625254434  | -3.46143678412186 | 3.55852955970295  |
| O | -0.66367377050918 | -4.73187558242972 | -0.07508355655631 |
| C | -1.15196126684478 | -5.64924309727992 | 0.94698332702285  |
| H | -0.71808763173011 | -6.63993713977447 | 0.76330367127153  |
| H | -0.80605362925388 | -5.27663596442810 | 1.91416255076486  |
| C | -2.66551044833475 | -5.65620386237448 | 0.77913392958145  |
| H | -3.10724976825262 | -4.78862651373474 | 1.28014782044542  |
| H | -3.12283806637740 | -6.56439213958870 | 1.17958559933007  |
| C | -2.81162434957084 | -5.53326628787745 | -0.74621474670777 |
| H | -3.78758231392157 | -5.14969908427810 | -1.05312384516496 |
| H | -2.65559591262419 | -6.50790324168385 | -1.21986457543200 |
| C | -1.68115729524205 | -4.57291016391828 | -1.11635435559194 |
| H | -2.00199266323207 | -3.52562809427116 | -1.10223130787019 |
| H | -1.21422748386218 | -4.79576946388175 | -2.07902632803961 |
| O | 1.14120294739001  | 0.01306788547128  | 4.91283519467442  |
| C | 2.17419438842395  | 0.92512517972426  | 4.45294265889091  |
| H | 2.50573864739482  | 1.53518449720419  | 5.30447735669300  |
| H | 3.01689978749448  | 0.32778887884211  | 4.09266149356291  |
| C | 1.52963385697650  | 1.78485197376093  | 3.36728433100106  |
| H | 1.58595893859241  | 1.28835763023520  | 2.39300506517246  |
| H | 1.99567657866086  | 2.77023078026578  | 3.28305537020628  |
| C | 0.06533559205703  | 1.84008244172994  | 3.82492543766840  |
| H | -0.62137362842772 | 2.05972788132279  | 3.00251926866288  |
| H | -0.06841225897170 | 2.58695120402423  | 4.61518609193369  |
| C | -0.13784231889928 | 0.43075356382394  | 4.37615233058853  |
| H | -0.42967321274703 | -0.26546287154218 | 3.57519960491708  |
| H | -0.87987525693236 | 0.37127079347821  | 5.17869845493450  |

**6b<sup>-</sup>** [W(CO)<sub>5</sub>P<sup>t</sup>Bu(Me)NMe]

Energy = -1269.599366224397

ZPE = 0.23890678

G<sub>corr</sub> = 0.18846502

|   |                   |                   |                   |
|---|-------------------|-------------------|-------------------|
| P | -1.73922054368885 | -0.20171685626386 | 0.24464519149940  |
| W | -0.64221500180049 | 1.34385563082045  | 2.09982460340954  |
| C | 0.34303950905334  | 2.25404859549302  | 0.55153870392613  |
| O | 0.93542181900303  | 2.75164294776591  | -0.31678348744114 |
| C | -2.34219703269231 | 2.45631728886088  | 1.76017849132920  |
| O | -3.28879176847240 | 3.09990971897383  | 1.57535663832634  |
| C | -0.00479916287256 | 2.70802044845769  | 3.41962773817683  |
| O | 0.36057459957071  | 3.51894314918744  | 4.18063619304865  |
| C | 1.05079834115380  | 0.25173733851483  | 2.47057092846489  |
| O | 2.02508033434948  | -0.32647020294529 | 2.73624026572917  |
| C | -1.53114152142144 | 0.23815590671255  | 3.59028139733187  |
| O | -1.94543755443198 | -0.40116787336339 | 4.46887979872146  |
| C | -0.80698965180090 | -1.84925338057620 | 0.02670469417418  |
| C | 0.64499242840793  | -1.62407581214997 | -0.41306059216718 |
| H | 0.69748939690574  | -1.28256707816211 | -1.45190544491001 |
| H | 1.14346648352073  | -0.87900650135651 | 0.21484700425997  |
| H | 1.21251896980191  | -2.56195256524246 | -0.33793218650531 |
| C | -0.85100773329966 | -2.57349608724438 | 1.38050400184117  |
| H | -0.33439714237420 | -1.99887880532220 | 2.15547830420810  |
| H | -1.88475702621562 | -2.73003879641385 | 1.70696686541025  |
| H | -0.36455278389227 | -3.55495109791305 | 1.29796888460923  |
| C | -1.54976329952556 | -2.69593083366785 | -1.01932017884045 |
| H | -1.48811479657271 | -2.24678298311607 | -2.01659607168733 |
| H | -1.10345107775916 | -3.69846395452635 | -1.07314093480979 |
| H | -2.60666061970632 | -2.79137204880176 | -0.75090446684374 |
| N | -3.33739587399200 | -0.43895923965140 | 0.31114181244522  |



|   |                   |                   |                   |
|---|-------------------|-------------------|-------------------|
| C | -4.01518000005330 | -0.59793778594986 | 1.58107311588626  |
| H | -3.90018778960148 | -1.59715665354569 | 2.04324238897056  |
| H | -3.68072087029290 | 0.13199506337902  | 2.34314483743230  |
| H | -5.09537920535932 | -0.43868498442280 | 1.44363749935774  |
| C | -1.52637468727306 | 0.55805074877044  | -1.41603305154173 |
| H | -0.47567057448615 | 0.61409436169731  | -1.71178906675676 |
| H | -2.08584596139556 | -0.02658537406278 | -2.15367859943466 |
| H | -1.93903020278647 | 1.57017771606446  | -1.38224527762034 |

**[Li(thf)<sub>2</sub>I]7b** [Li(thf)<sub>2</sub>I] [W(CO)<sub>5</sub>P<sup>t</sup>Bu(Me)NHMe]

Energy = -2041.42494939422

ZPE = 0.49001675

G<sub>corr</sub> = 0.41988973

|    |                   |                   |                   |
|----|-------------------|-------------------|-------------------|
| P  | -0.13278352533495 | 1.13895455065824  | -0.00082195578096 |
| H  | 0.18440321977780  | 1.22867762455225  | -2.23167991202331 |
| W  | 1.90947261503318  | 2.42464905325153  | 0.85938502483051  |
| C  | 3.08420453252867  | 0.73355583186548  | 0.89674708957114  |
| O  | 3.77643064564016  | -0.19269304579417 | 0.95028025340165  |
| C  | 2.34902362096294  | 2.75604755950618  | -1.11993562812435 |
| O  | 2.57740646633785  | 2.94545681642271  | -2.23968578052452 |
| C  | 3.51771547924087  | 3.52311328959204  | 1.40500656234634  |
| O  | 4.44177449364548  | 4.15826077375665  | 1.70730091697285  |
| C  | 1.45648502242538  | 2.12905503105171  | 2.84753963414000  |
| O  | 1.23526583347092  | 1.99395141218263  | 3.97513651075158  |
| C  | 0.75588393206325  | 4.12864841088973  | 0.89094174436575  |
| O  | 0.12531130041165  | 5.09756140339529  | 0.92296342338306  |
| C  | -0.85253429747526 | -0.24265791326404 | 1.03795468409652  |
| C  | -1.67676741079320 | 0.43176777153270  | 2.15325661241720  |
| H  | -1.10532374198613 | 1.20888391867760  | 2.67141591667907  |
| H  | -2.59403274406881 | 0.87783627487438  | 1.76010753426622  |
| H  | -1.95411082660847 | -0.32856730488734 | 2.89178429832880  |
| C  | -1.75896095411601 | -1.15451215375170 | 0.19898456341455  |
| H  | -2.53483698951732 | -0.59676243740747 | -0.33533204255445 |
| H  | -1.18115558823467 | -1.72853659882716 | -0.53055646346252 |
| H  | -2.25563899148566 | -1.86747441424900 | 0.86770269332821  |
| C  | 0.27878373425115  | -1.06730040238168 | 1.67574098124682  |
| H  | 0.90665845850976  | -0.45025324549545 | 2.32373270800125  |
| H  | -0.16708851401242 | -1.86001211009244 | 2.28746457104270  |
| H  | 0.91946409171032  | -1.53987314209810 | 0.92610046086596  |
| C  | 1.20694396531237  | -0.48774296233473 | -1.77893088224461 |
| H  | 1.28307825719806  | -0.72863479836206 | -2.84129185637240 |
| H  | 2.15529624786993  | -0.05318874108677 | -1.44302851976349 |
| H  | 1.02659392480660  | -1.41136854969577 | -1.22737585973276 |
| N  | 0.06276201412587  | 0.43638487672272  | -1.58959505518942 |
| Li | -1.54619193011268 | 0.06191303893414  | -2.97930156359081 |
| O  | -0.85316661652261 | 1.60380492417622  | -4.05078857191096 |
| C  | 0.02759761923788  | 1.44092688800087  | -5.20169870114121 |
| H  | 0.91873629977402  | 2.05813345211325  | -5.04011202090027 |
| H  | 0.31255648256142  | 0.38858219337773  | -5.23490311162766 |
| C  | -0.78267226394497 | 1.92056239032005  | -6.42315079675353 |
| H  | -1.06175422993752 | 1.08605445010376  | -7.07019938498140 |
| H  | -0.19418509270450 | 2.62617756133781  | -7.01437477552833 |
| C  | -2.03623352078104 | 2.59850597150683  | -5.81077434475385 |
| H  | -2.27603204834411 | 3.54922230922614  | -6.29286414101783 |
| H  | -2.90667515645687 | 1.94027975694426  | -5.88602773203115 |
| C  | -1.66457549382436 | 2.77613626892235  | -4.34329131098920 |
| H  | -2.51269558024388 | 2.75392668065330  | -3.65746585705705 |
| H  | -1.05581815884560 | 3.67391145716829  | -4.17500922820654 |
| O  | -1.15010424523213 | -1.51258998341353 | -4.03300703848434 |

|   |                   |                   |                   |
|---|-------------------|-------------------|-------------------|
| C | -1.95949887392621 | -1.62462008202283 | -5.24463964618962 |
| H | -2.48118186392822 | -0.67268587784788 | -5.36095717372923 |
| H | -1.28419417075159 | -1.78656696409687 | -6.09194544013309 |
| C | -2.91015972651250 | -2.81865441248489 | -5.02278950232744 |
| H | -2.79403826844267 | -3.55100483744341 | -5.82580532112522 |
| H | -3.95180947645017 | -2.49233511519827 | -4.99652209890730 |
| C | -2.47594989528701 | -3.40775603130595 | -3.65963182873574 |
| H | -2.49690178177823 | -4.50033468531759 | -3.64639366429100 |
| H | -3.12175865068009 | -3.02941108958034 | -2.86209877299933 |
| C | -1.06888056314645 | -2.85290955076154 | -3.48075472874643 |
| H | -0.32332781579988 | -3.42524103134266 | -4.04818880566240 |
| H | -0.74312549572659 | -2.75935790483199 | -2.44382370045562 |
| I | -4.23713220539606 | 0.31189253670001  | -2.73130112342727 |
| C | -1.54866985123631 | 2.22451694058000  | -0.38289328106871 |
| H | -1.84593038144789 | 2.76658052722679  | 0.51694586361316  |
| H | -2.39990896063744 | 1.65724760514221  | -0.77607375038680 |
| H | -1.22659107516329 | 2.95602743400855  | -1.13039942412543 |

**7b** [W(CO)<sub>5</sub>P<sup>t</sup>Bu(Me)NHMe)]

Energy = -1270.118331986758

ZPE = 0.25293369

G<sub>corr</sub> = 0.20316884

|   |                   |                   |                   |
|---|-------------------|-------------------|-------------------|
| W | -0.91991722272735 | 1.21269621268144  | 1.86710820797053  |
| C | 0.36278913723111  | 1.96493332478655  | 0.44593833671635  |
| O | 1.08729766245268  | 2.36893181646343  | -0.36158300440018 |
| C | -2.42345172076207 | 2.43682823981283  | 1.18074934351856  |
| O | -3.25034828628592 | 3.15950061142865  | 0.81290171963695  |
| C | -0.43224292762341 | 2.66248005346259  | 3.18940257983895  |
| O | -0.15918811052871 | 3.50707303020242  | 3.93974503401575  |
| C | 0.61977726042219  | 0.08921786627728  | 2.64338476510304  |
| O | 1.49769590143016  | -0.48985322656201 | 3.12895511174408  |
| C | -2.19110569157267 | 0.30745990062469  | 3.20568560542050  |
| O | -2.89866292905103 | -0.23379154238958 | 3.94545549880675  |
| C | -0.58816012144254 | -1.97147797987438 | -0.23329191289225 |
| C | 0.83098635747356  | -1.45997366936782 | -0.53162770871138 |
| H | 0.85065048348641  | -0.81960421910050 | -1.41953012556929 |
| H | 1.24472991888760  | -0.89762618974338 | 0.30944773882411  |
| H | 1.48457551663007  | -2.31919366434054 | -0.72118027304101 |
| C | -0.57778120752725 | -2.85120741348062 | 1.03004734203950  |
| H | -0.32374482082308 | -2.27409794830782 | 1.92448603421940  |
| H | -1.54622257431158 | -3.33631626850978 | 1.19031647744851  |
| H | 0.17270607764971  | -3.64091261844372 | 0.91082013701929  |
| C | -1.11135260815608 | -2.78383464260184 | -1.43029905143639 |
| H | -1.02550140986929 | -2.22217431498035 | -2.36510334507811 |
| H | -0.50727654834464 | -3.69373090719376 | -1.52856675561446 |
| H | -2.15592116573154 | -3.07337981698235 | -1.28712944235888 |
| C | -4.38205359918910 | -0.38121400204518 | 0.49234627080621  |
| H | -5.26144226774957 | -1.01113487953662 | 0.64522009579277  |
| H | -4.30547811216034 | 0.32672171905107  | 1.32950811682783  |
| H | -4.51967838738933 | 0.18526218181467  | -0.43138779932590 |
| N | -3.20275709118769 | -1.25719078498246 | 0.35826246830912  |
| H | -3.14695927669394 | -1.88638070472257 | 1.15868133540656  |
| P | -1.68228995713644 | -0.49348058178029 | 0.10599900204554  |
| C | -1.94161915150909 | 0.28365389425213  | -1.52800619367130 |
| H | -0.97141439964359 | 0.59177976281165  | -1.92736486464541 |
| H | -2.42291091912054 | -0.41341195931934 | -2.21821375034384 |
| H | -2.56002780912667 | 1.17724872059551  | -1.41717699442190 |

TS(Li(thf)<sub>2</sub>-4b+IMe→[Li(thf)<sub>2</sub>I]8b)

Energy = -2041.29001515128

ZPE = 0.48376397

G<sub>corr</sub> = 0.41386426

Imf = -274.28 cm<sup>-1</sup>

|    |                   |                   |                   |
|----|-------------------|-------------------|-------------------|
| P  | 0.11030672916272  | -0.06103512242715 | 0.26503252309638  |
| H  | 1.49161095621970  | 0.10411505630118  | 0.56802231714785  |
| W  | -0.56116388342559 | 2.36910254439734  | -0.53228996534873 |
| C  | 1.05440622883461  | 1.86845984660418  | -1.71417342739081 |
| O  | 1.95849903480005  | 1.59490973180470  | -2.37652607576960 |
| C  | -1.66440095680204 | 2.42398969248038  | -2.27306418467442 |
| O  | -2.23985553447348 | 2.53613649813910  | -3.26903379025865 |
| C  | -0.29477718676230 | 4.33111732521289  | -0.91984317626194 |
| O  | -0.09829821122829 | 5.45665684531812  | -1.11611676574086 |
| C  | 0.68338347578246  | 2.72975674160350  | 1.07855505120693  |
| O  | 1.39516054680145  | 3.01746765569947  | 1.94027246789343  |
| C  | -2.19630690602057 | 2.86176932006181  | 0.62333146884605  |
| O  | -3.11489085818275 | 3.18142348864786  | 1.24712421805841  |
| C  | -0.46203820522442 | -0.60638639330015 | 2.01610196399042  |
| C  | -1.36389212636969 | 0.42693946675740  | 2.69761619424539  |
| H  | -0.87016953351211 | 1.39712534437488  | 2.80478939115933  |
| H  | -2.29886228308589 | 0.57698413052662  | 2.14974804427935  |
| H  | -1.62347779747089 | 0.07223292253278  | 3.70300603051473  |
| C  | -1.21386942131644 | -1.93854806216144 | 1.87083757047387  |
| H  | -2.10671236674776 | -1.84689962182386 | 1.24272712423772  |
| H  | -0.57536813658420 | -2.70889459158236 | 1.43081196018207  |
| H  | -1.53127787153012 | -2.27796618374470 | 2.86503834758115  |
| C  | 0.80976425255933  | -0.81842650256738 | 2.85723798376550  |
| H  | 1.36634605631935  | 0.11611831553799  | 2.98425389767158  |
| H  | 0.53035479325364  | -1.18695180251238 | 3.85307866798217  |
| H  | 1.47610051596409  | -1.55415705988008 | 2.39477659047722  |
| C  | 1.17495896734616  | -2.19852089710517 | -0.81540837588066 |
| H  | 1.25506361127096  | -2.68853759091940 | -1.79360011265777 |
| H  | 2.13479718002289  | -1.69481339810329 | -0.61365386990576 |
| H  | 1.06412725774400  | -2.99592257614337 | -0.06200712713048 |
| N  | 0.04139102134410  | -1.25732584845609 | -0.82738308691788 |
| Li | -1.39702063447981 | -2.00332260198832 | -1.93746891132048 |
| O  | -1.45520342300852 | -0.95686703292160 | -3.59021347707824 |
| C  | -0.18732868460555 | -0.59414604351531 | -4.19316400903524 |
| H  | -0.20007483288865 | 0.47932206068086  | -4.42367289654993 |
| H  | 0.58601762005550  | -0.80127006688179 | -3.45365151041155 |
| C  | -0.13158045859796 | -1.43972905442238 | -5.46322209142505 |
| H  | 0.25501315138577  | -2.43591572571746 | -5.22945029066911 |
| H  | 0.51018172012590  | -0.99238823850618 | -6.22625537697957 |
| C  | -1.61720526923160 | -1.51951614557949 | -5.90616435244028 |
| H  | -1.81008487615356 | -0.89167095344092 | -6.77946826743471 |
| H  | -1.89882291355670 | -2.54439242597822 | -6.15847916684302 |
| C  | -2.40719466444355 | -1.00179039670888 | -4.68581498730987 |
| H  | -3.22811140202187 | -1.64445162752644 | -4.36601841326186 |
| H  | -2.78570058751745 | 0.01349012842196  | -4.85284040915751 |
| O  | -1.27839216854129 | -3.90916933310008 | -2.26857412767331 |
| C  | -1.95698977987944 | -4.51591107449474 | -3.40981095976091 |
| H  | -2.88276739746841 | -3.95801522001979 | -3.59493069190113 |
| H  | -1.29235959901450 | -4.42637637201958 | -4.27230672487916 |
| C  | -2.24550968719173 | -5.95337395276561 | -2.99327343030899 |
| H  | -1.37339569588908 | -6.58903758529982 | -3.18025240865038 |
| H  | -3.10429986444630 | -6.36939061971725 | -3.52586292903234 |
| C  | -2.48758423159413 | -5.80170157874435 | -1.48371945722809 |
| H  | -2.36618264075875 | -6.73736104623925 | -0.93225877441515 |
| H  | -3.49224841342058 | -5.40789960000581 | -1.29847744424686 |

|   |                   |                   |                   |
|---|-------------------|-------------------|-------------------|
| C | -1.43966764291574 | -4.76583689773798 | -1.09353429613543 |
| H | -0.46790188060091 | -5.22230911249858 | -0.87422743941753 |
| H | -1.74405233490684 | -4.12957689353090 | -0.25866658020145 |
| I | -4.24341255385050 | -1.86609106933672 | -1.20391719588915 |
| C | -2.62045739485797 | 0.40090960265975  | -0.80682243262860 |
| H | -3.45312153196090 | 1.07977728796700  | -0.92496637374251 |
| H | -2.47874001644476 | -0.06057928553009 | 0.15401335752184  |
| H | -2.11134673000784 | 0.03227281922617  | -1.68004349636517 |

# **[Li(thf)<sub>2</sub>I]8b**

Energy = -2041.3134723197

ZPE = 0.48489085

G<sub>corr</sub> = 0.41368206

|    |                   |                   |                   |
|----|-------------------|-------------------|-------------------|
| P  | 0.09684864809816  | -0.29168336476944 | 0.46474323202731  |
| H  | 1.40378804278904  | -0.42071334356969 | 0.99835305344806  |
| W  | -0.19272677779173 | 2.41529966339190  | -0.05161777210966 |
| C  | 1.35007014144839  | 2.12119956937380  | -1.39233406759508 |
| O  | 2.21777194496397  | 2.00373989064529  | -2.14171495506446 |
| C  | -1.09521678944116 | 3.60202210067906  | -1.50136658396061 |
| O  | -1.54159371317639 | 4.29906039067291  | -2.29807542923607 |
| C  | 0.44507647396722  | 4.27225276591062  | 0.46967743434846  |
| O  | 0.78546842523516  | 5.33554366202573  | 0.76042730047734  |
| C  | 1.14239348630420  | 2.06399889434344  | 1.48119486032469  |
| O  | 1.94055106262396  | 1.95720072936881  | 2.30838993174885  |
| C  | -1.82284944513359 | 2.64159253159499  | 1.19440407222184  |
| O  | -2.73875455175835 | 2.82334064852258  | 1.86993958298941  |
| C  | -0.94318046984144 | -0.92066622999481 | 1.87560507019393  |
| C  | -2.43921808584608 | -0.82663378492313 | 1.56036765585581  |
| H  | -2.76303742503303 | 0.20787937466992  | 1.42429845666522  |
| H  | -2.70452482263928 | -1.39085664029752 | 0.66128218880025  |
| H  | -3.00138618170595 | -1.24560768168349 | 2.40337812828349  |
| C  | -0.54182467536238 | -2.39319700882290 | 2.08856049268097  |
| H  | -0.81771311730909 | -2.99828854918375 | 1.22352652991508  |
| H  | 0.53438736440859  | -2.49691947686986 | 2.26279393513183  |
| H  | -1.07264543685701 | -2.77376947438861 | 2.96938300457700  |
| C  | -0.59989190096688 | -0.10847000793159 | 3.13406297977237  |
| H  | -0.85198351705860 | 0.94981265774503  | 3.02434075877866  |
| H  | -1.18821531169677 | -0.50599220457248 | 3.96871825086640  |
| H  | 0.45952962757031  | -0.19408552780867 | 3.39485146145886  |
| C  | 1.19215085104512  | -1.36039859944657 | -1.64305211990523 |
| H  | 1.15481748307317  | -0.62670627261574 | -2.45950961976380 |
| H  | 2.12621028044177  | -1.20065581474913 | -1.08285173611784 |
| H  | 1.23657067289306  | -2.35313496432504 | -2.10403760185652 |
| N  | -0.00625903877141 | -1.29392040850954 | -0.79000445542659 |
| Li | -1.47439481533526 | -1.94062412395630 | -2.05272963109999 |
| O  | -1.18377642584452 | -1.20924147020251 | -3.88103119882817 |
| C  | -0.35397113287149 | -1.84373561969057 | -4.88769624657088 |
| H  | 0.41705867401906  | -1.12881369584203 | -5.20179972680012 |
| H  | 0.11652681079110  | -2.70573250408100 | -4.41465739883842 |
| C  | -1.30144268401471 | -2.19805565196815 | -6.05281755961655 |
| H  | -1.49178252004056 | -3.27291529234931 | -6.09800814684288 |
| H  | -0.86606186084853 | -1.89120141015785 | -7.00730164832721 |
| C  | -2.60201121792464 | -1.41324817741858 | -5.73637437817371 |
| H  | -2.99488769735809 | -0.88148262155053 | -6.60676903835566 |
| H  | -3.37692901388244 | -2.08769717743444 | -5.36086694358538 |
| C  | -2.18045218183663 | -0.46079646801840 | -4.62052957553352 |
| H  | -2.97686648927248 | -0.21039925413475 | -3.91880030402637 |
| H  | -1.71577672994193 | 0.45416534057641  | -5.01394551983905 |
| O  | -0.94797413784862 | -3.83727606420516 | -2.36248041565525 |

|   |                   |                   |                   |
|---|-------------------|-------------------|-------------------|
| C | -1.86319267022604 | -4.69677808237676 | -3.09765658846691 |
| H | -2.58954231348808 | -4.04053689772309 | -3.57956906897216 |
| H | -1.28860100442527 | -5.24387358792353 | -3.85503686786981 |
| C | -2.48967505021211 | -5.64666471325804 | -2.05529018045319 |
| H | -2.38345674884626 | -6.68755388972553 | -2.37226077128725 |
| H | -3.55110535055939 | -5.42985941062326 | -1.91786759187186 |
| C | -1.69304475834394 | -5.36713657046676 | -0.75632039434091 |
| H | -1.44665470315285 | -6.27908575496587 | -0.20625463697710 |
| H | -2.26395586588836 | -4.70340860029050 | -0.10007617055938 |
| C | -0.45207972675289 | -4.64044135786715 | -1.26477221263836 |
| H | 0.30277604688889  | -5.34204909177112 | -1.64662561553987 |
| H | 0.00811662376936  | -3.95303727136089 | -0.55333620223671 |
| I | -4.25158128817574 | -2.01857904035679 | -1.75899400008763 |
| C | -1.67859418142321 | 1.18250969568092  | -1.43304790300396 |
| H | -2.44586214720729 | 1.76304822826461  | -1.94745600633961 |
| H | -2.18237478420816 | 0.45780569098879  | -0.79278298985632 |
| H | -1.03767990001137 | 0.67905031972662  | -2.15483310693502 |

TS([Li(thf)<sub>2</sub>I]8b→[Li(thf)<sub>2</sub>I]9b·[W])

Energy = -2041.30090939014

ZPE = 0.48506018

G<sub>corr</sub> = 0.41642213

Imf = -196.99 cm<sup>-1</sup>

|    |                   |                   |                   |
|----|-------------------|-------------------|-------------------|
| P  | -0.14294924385641 | -0.17550536447253 | 0.33177484626803  |
| H  | 1.22818153416148  | 0.02490820312796  | 0.66736231832313  |
| W  | -0.40493769431440 | 2.38112431248153  | -0.55162679238151 |
| C  | 1.10566597214849  | 1.52314559602072  | -1.65854797957772 |
| O  | 1.97898438740570  | 1.09788034508402  | -2.28081247769888 |
| C  | -1.44692819512523 | 2.63742644526297  | -2.33907849771337 |
| O  | -1.98333735791230 | 2.83407202193488  | -3.33624146777151 |
| C  | 0.44910122073774  | 4.16134156266748  | -0.94548286230644 |
| O  | 0.94418164901163  | 5.18292764299577  | -1.17336172431777 |
| C  | 0.75686680650328  | 2.49682607201155  | 1.13448719805031  |
| O  | 1.44752784615990  | 2.66630721168304  | 2.04528767728629  |
| C  | -1.87721877211864 | 3.35371985289571  | 0.54219251989292  |
| O  | -2.66479003576003 | 3.93892208009102  | 1.14427624528242  |
| C  | -0.81979144138160 | -0.52163638649110 | 2.05934987450704  |
| C  | -1.70970499362122 | 0.59538021129359  | 2.61540684328338  |
| H  | -1.17159945224661 | 1.54316501907460  | 2.70196059772780  |
| H  | -2.59959143529893 | 0.75150957363531  | 2.00012798213881  |
| H  | -2.04491844014885 | 0.31003167173508  | 3.61933320704049  |
| C  | -1.59968662702279 | -1.84826513961195 | 2.00262285309834  |
| H  | -2.48288847796295 | -1.79692010532906 | 1.35675969245204  |
| H  | -0.96634289573671 | -2.66130713162655 | 1.63770352446712  |
| H  | -1.93621073652115 | -2.09309632477498 | 3.01700228217446  |
| C  | 0.42078285786879  | -0.71166882589430 | 2.95331925441166  |
| H  | 0.99955096372843  | 0.21106893296711  | 3.05108924030819  |
| H  | 0.08924086004119  | -1.01588617534422 | 3.95308744131413  |
| H  | 1.07903964198438  | -1.49514255369952 | 2.56260940754809  |
| C  | 1.19459709526567  | -2.08663940012794 | -0.85023915162589 |
| H  | 1.33275055436221  | -2.38690185127875 | -1.89482323505741 |
| H  | 2.04995779521642  | -1.45744076020626 | -0.55720893349539 |
| H  | 1.23627932340105  | -2.99654297565484 | -0.23519247263891 |
| N  | -0.09627932681498 | -1.40036631525885 | -0.69874180480713 |
| Li | -1.52837633846662 | -2.11321249934576 | -1.90465449950680 |
| O  | -1.57669777971639 | -1.00932870996488 | -3.53715482399911 |
| C  | -0.36468275564870 | -0.70717636590644 | -4.26976342732093 |
| H  | -0.29177165446178 | 0.38092666431043  | -4.39660700022842 |
| H  | 0.47476009192180  | -1.06059774826274 | -3.67067858279025 |

|   |                   |                   |                   |
|---|-------------------|-------------------|-------------------|
| C | -0.53418153743662 | -1.41638293255522 | -5.61741646608503 |
| H | -0.10549652494100 | -2.42079395119879 | -5.57421864673583 |
| H | -0.03664742800298 | -0.86817697029596 | -6.42113861002731 |
| C | -2.07496722306676 | -1.48602518857466 | -5.81183551421797 |
| H | -2.40595802743269 | -0.90634117730517 | -6.67687153469402 |
| H | -2.40067526650877 | -2.51935566885492 | -5.95167546663516 |
| C | -2.64816098879416 | -0.90189943738264 | -4.51005617079798 |
| H | -3.50181905582564 | -1.44204643828083 | -4.09850821201431 |
| H | -2.90469717317025 | 0.15897429155836  | -4.62539621660916 |
| O | -1.04489651801001 | -3.95046364296171 | -2.38633652213882 |
| C | -1.73383599573523 | -4.57979056893123 | -3.51007848392263 |
| H | -2.70671485575916 | -4.08793318381890 | -3.62855177143762 |
| H | -1.12409406520874 | -4.41808931213983 | -4.40236120961600 |
| C | -1.89101077303414 | -6.04782023432014 | -3.12742016635069 |
| H | -0.99416907695200 | -6.61425773133968 | -3.40073698747894 |
| H | -2.75624766287820 | -6.50569280909415 | -3.61351634407397 |
| C | -2.03243995068312 | -5.96567322322806 | -1.59986329833548 |
| H | -1.80263980178446 | -6.90758096251025 | -1.09511867208723 |
| H | -3.04524962202719 | -5.65027227933617 | -1.32989508141164 |
| C | -1.03871755305800 | -4.86612570987518 | -1.24640829375538 |
| H | -0.01976274078201 | -5.25334651277100 | -1.12762882579968 |
| H | -1.31978988239848 | -4.29057066947827 | -0.36026747796911 |
| I | -4.21245342998346 | -2.44507379971936 | -1.13681693061863 |
| C | -2.05542117681431 | 0.50279392039474  | -0.55775068981891 |
| H | -2.85591010679631 | 1.19986998037398  | -0.31699234757619 |
| H | -2.29135182128071 | -0.40725237441990 | 0.00646003250773  |
| H | -2.01609268741701 | 0.23387680004329  | -1.60939136463669 |

**[Li(thf)<sub>2</sub>I]9b·[W]**

Energy = -2041.35776402457

ZPE = 0.48507920

G<sub>corr</sub> = 0.41619172

|   |                   |                   |                   |
|---|-------------------|-------------------|-------------------|
| P | -0.30155715484627 | -0.52057311145446 | 0.48471511093442  |
| H | 0.79275268720461  | 0.36028486674031  | 0.69172616365919  |
| W | -0.87398732903565 | 2.94927281160762  | -1.10116911737029 |
| C | 0.90405862167838  | 2.15137141613032  | -1.76888252183458 |
| O | 1.92128866973054  | 1.75286348277015  | -2.14274347092423 |
| C | -1.74046316598895 | 2.67558579970571  | -2.95313890239192 |
| O | -2.20664078830198 | 2.60132696237559  | -4.00589297059953 |
| C | -0.27357465368780 | 4.72089082224016  | -1.71541878213200 |
| O | 0.08318381200720  | 5.76486894563109  | -2.08606659181373 |
| C | 0.01811945067555  | 3.33491243878694  | 0.71666229524535  |
| O | 0.53819440121187  | 3.60230314418657  | 1.71220368478906  |
| C | -2.63733758503286 | 3.78701221797985  | -0.42554316731175 |
| O | -3.60703182226382 | 4.29385593090899  | -0.06155913977229 |
| C | -0.65866540087014 | -1.03424756135989 | 2.22008864372878  |
| C | -0.80066021770768 | 0.22357866061234  | 3.09568491450102  |
| H | 0.07771017154234  | 0.87379879992650  | 3.01411426375285  |
| H | -1.69324271241785 | 0.80168026271891  | 2.83680007922724  |
| H | -0.89390762411600 | -0.08139317487768 | 4.14424687839889  |
| C | -1.93762996453116 | -1.88500796781448 | 2.25146746152013  |
| H | -2.81787097183599 | -1.30552466159943 | 1.95776623436326  |
| H | -1.85877456982682 | -2.74111627535615 | 1.57439531777936  |
| H | -2.09555389835311 | -2.25966687467126 | 3.26941334246061  |
| C | 0.55275444208274  | -1.86735508688240 | 2.68577478320706  |
| H | 1.48755619481064  | -1.30064302600618 | 2.60636863776414  |
| H | 0.41144620721511  | -2.14211145602223 | 3.73721507615715  |
| H | 0.64955239600458  | -2.78776480913216 | 2.10307779831146  |
| C | 1.21052259605435  | -2.32979675525754 | -0.73594818080403 |

|    |                   |                   |                   |
|----|-------------------|-------------------|-------------------|
| H  | 1.35968928720354  | -2.65806170735355 | -1.77000026971366 |
| H  | 2.07442634769680  | -1.70990318574262 | -0.45343866876691 |
| H  | 1.22149820859087  | -3.22737083509890 | -0.10402294749320 |
| N  | -0.06163646200887 | -1.59442918655663 | -0.65321431897724 |
| Li | -1.51587131040973 | -2.09128520808319 | -1.92731518979710 |
| O  | -1.43904768766615 | -0.78894468491654 | -3.40216881730350 |
| C  | -0.12756802540358 | -0.55780376106537 | -3.97638330712412 |
| H  | -0.04806372324691 | 0.49392172679826  | -4.28166185346126 |
| H  | 0.60275182029394  | -0.76939834307567 | -3.19477797665126 |
| C  | -0.08420506253634 | -1.49165961372571 | -5.17965077981273 |
| H  | 0.15480990806746  | -2.50652775718812 | -4.84823275848378 |
| H  | 0.65825388848138  | -1.18398096511322 | -5.92026263008109 |
| C  | -1.53159141800872 | -1.41540572845978 | -5.72144539212423 |
| H  | -1.59808356237892 | -0.71415319725516 | -6.55723578916841 |
| H  | -1.88418951262608 | -2.38902197380098 | -6.06919586737978 |
| C  | -2.36263150701568 | -0.89979080885098 | -4.52500545906452 |
| H  | -3.16057203342434 | -1.57185738052871 | -4.20461572587038 |
| H  | -2.78565851379807 | 0.09004111990675  | -4.72316220656903 |
| O  | -1.18781658603117 | -3.94154430730134 | -2.48215373306143 |
| C  | -1.97778976547182 | -4.54168828647505 | -3.55610161443093 |
| H  | -2.91862897989376 | -3.98441369231108 | -3.63358333596662 |
| H  | -1.40708700927026 | -4.44043849403655 | -4.48243230248063 |
| C  | -2.21761005801597 | -5.98822791702192 | -3.13537744783475 |
| H  | -1.38272582452035 | -6.62364746737181 | -3.45003680503498 |
| H  | -3.14171480813158 | -6.38795077999181 | -3.56046425708506 |
| C  | -2.25890172071569 | -5.87316927665342 | -1.60408889125478 |
| H  | -2.06971364336926 | -6.82244661875563 | -1.09627768531232 |
| H  | -3.22644909317892 | -5.47738379626278 | -1.27926360635387 |
| C  | -1.16491129098540 | -4.84883499546965 | -1.33460748302396 |
| H  | -0.17132433705503 | -5.30954040251228 | -1.28525686536033 |
| H  | -1.33475005601571 | -4.24660711129154 | -0.43804011028860 |
| I  | -4.20190634123840 | -2.17134999384814 | -1.15469851343335 |
| C  | -1.66325852992326 | 0.54193884397479  | -0.06442734734448 |
| H  | -1.89020707171294 | 1.32918428206793  | 0.65998004932768  |
| H  | -2.57653914786030 | -0.04792077209095 | -0.22705093029912 |
| H  | -1.40585416982126 | 0.87886547357570  | -1.10394100376407 |

TS([Li(thf)<sub>2</sub>I]9b·[W]→[Li(thf)<sub>2</sub>I]10b·[W])

Energy = -2041.28707148487

ZPE = 0.48168973

G<sub>corr</sub> = 0.41139303

Imf = -1333.15 cm<sup>-1</sup>

|   |                   |                   |                   |
|---|-------------------|-------------------|-------------------|
| P | 0.19079435057047  | -0.00211414777546 | -0.01289468197248 |
| H | 1.19119567033444  | -0.17666239454854 | -1.08796460966751 |
| W | 0.89520434383492  | 3.77865206126503  | -0.10862621917248 |
| C | 2.16474730521619  | 3.12821668658673  | -1.59466806919251 |
| O | 2.93195262977808  | 2.81832168569284  | -2.40081608315138 |
| C | -0.26616659598293 | 4.79494495238164  | -1.47812121171604 |
| O | -0.88744615562494 | 5.40180896670727  | -2.23811564903460 |
| C | 2.04342199244689  | 5.36628143793670  | 0.07563818347975  |
| O | 2.71878337078760  | 6.30759236392356  | 0.18911888568710  |
| C | 2.08714597459381  | 2.79558414230181  | 1.25845061405965  |
| O | 2.79270299963999  | 2.29847478574152  | 2.02522099648248  |
| C | -0.26768210456352 | 4.51829318457602  | 1.42744097282710  |
| O | -0.87246131731541 | 4.97711683459290  | 2.29641401457187  |
| C | -0.68482140507649 | -0.58902088766924 | 1.55015670595545  |
| C | -0.71106302143870 | 0.53715595688668  | 2.59201571575692  |
| H | 0.29726015165149  | 0.89674888862272  | 2.82351659576093  |
| H | -1.32400612472197 | 1.38221545711078  | 2.26424034726412  |

|    |                   |                   |                   |
|----|-------------------|-------------------|-------------------|
| H  | -1.14810573162990 | 0.15268424206860  | 3.52122281995132  |
| C  | -2.09576181412176 | -0.98996628946663 | 1.09624269708721  |
| H  | -2.70563160454212 | -0.11956071908075 | 0.83960713818739  |
| H  | -2.06450249234324 | -1.64663781139663 | 0.21882109355003  |
| H  | -2.58915236627191 | -1.53397591443905 | 1.91068080007645  |
| C  | 0.08802261474739  | -1.80278367726412 | 2.09296343508297  |
| H  | 1.11800668127377  | -1.53541348336721 | 2.35041064275599  |
| H  | -0.41082607340102 | -2.16573697911955 | 2.99929834857492  |
| H  | 0.11233394286873  | -2.62297613448365 | 1.36959132558736  |
| C  | 0.47714092703994  | -2.27807551773705 | -1.42543057943378 |
| H  | 0.69385482255762  | -2.55428013843362 | -2.46176920208107 |
| H  | 1.41352383677647  | -2.32650650570033 | -0.84461631564795 |
| H  | -0.20687345429501 | -3.02722506220312 | -1.00759258986971 |
| N  | -0.14387957975971 | -0.94016926947671 | -1.40483558412079 |
| Li | -1.38341609839024 | -0.31887564906816 | -2.86080026166682 |
| O  | -0.43399548058473 | 1.13267482957858  | -3.76419904205318 |
| C  | 0.82842330030158  | 0.78381460147441  | -4.41844756875826 |
| H  | 1.60849946669781  | 0.81858054583117  | -3.65364750989891 |
| H  | 0.74906678218235  | -0.23808637206310 | -4.80011623780005 |
| C  | 1.03585782115757  | 1.82530313247520  | -5.52338804997552 |
| H  | 0.68091346529324  | 1.43753851229263  | -6.48335783390262 |
| H  | 2.08785680132944  | 2.10014012791457  | -5.62956316234296 |
| C  | 0.15043305864709  | 2.99867608968836  | -5.07108588338743 |
| H  | 0.66457543108517  | 3.60682108951435  | -4.31999504198851 |
| H  | -0.14978617820246 | 3.64717279549149  | -5.89762793303421 |
| C  | -1.03076089163718 | 2.27126382523239  | -4.44752678751971 |
| H  | -1.73133834436711 | 1.90848417223728  | -5.20984337101895 |
| H  | -1.58435150284733 | 2.83850112314735  | -3.69775841362296 |
| O  | -1.63065647622094 | -1.75827973813251 | -4.15203378046749 |
| C  | -2.17949086650373 | -1.37782219243202 | -5.45254967660392 |
| H  | -2.77140835263698 | -0.46451771852106 | -5.31775894665737 |
| H  | -1.33660425390647 | -1.17811990310307 | -6.11918920940460 |
| C  | -3.05184776212470 | -2.55062290376780 | -5.88547180212732 |
| H  | -2.44644676173153 | -3.31768447840285 | -6.38038378702714 |
| H  | -3.84798013371742 | -2.23848653048683 | -6.56602886828465 |
| C  | -3.57975484305791 | -3.06655095963640 | -4.53788881275472 |
| H  | -3.93607028675107 | -4.09885847739799 | -4.58205285148986 |
| H  | -4.38898733317092 | -2.42355069379847 | -4.17715468902161 |
| C  | -2.35914720339992 | -2.91800378000077 | -3.63742506988276 |
| H  | -1.69353303624837 | -3.78702708982240 | -3.69481724738577 |
| H  | -2.61012888126061 | -2.71502016878170 | -2.59246547270674 |
| I  | -3.94900241452898 | 0.55961871537461  | -2.29340076083620 |
| C  | -0.64304049709178 | 1.55170618032736  | -0.47258647298388 |
| H  | -0.57829620149872 | 2.27142055690502  | 0.37936037023701  |
| H  | -1.72150604118680 | 1.42505064643751  | -0.64314179429551 |
| H  | -0.21633677865698 | 1.89591459725925  | -1.42218331897397 |

**[Li(thf)<sub>2</sub>I]10b·[W]**

Energy = -2041.35776402457

ZPE = 0.48857241

G<sub>corr</sub> = 0.41923409

|   |                   |                  |                   |
|---|-------------------|------------------|-------------------|
| P | 0.55685623818358  | 0.05012019600752 | 0.57562902093480  |
| H | 0.95419213749250  | 0.68529914247582 | -1.54976433388136 |
| W | 0.91923441175854  | 3.86668471621864 | 0.01152172924314  |
| C | 2.39253683617051  | 2.83331695635003 | -0.97292883313677 |
| O | 3.25111443864243  | 2.29194283866032 | -1.53034424005899 |
| C | -0.04335731182112 | 4.25459201980941 | -1.77412780791248 |
| O | -0.51332203028964 | 4.55805767756333 | -2.78257388920424 |
| C | 1.94997099416230  | 5.52124033367031 | -0.28620984372246 |



|    |                   |                   |                   |
|----|-------------------|-------------------|-------------------|
| O  | 2.55513196450579  | 6.49802051860822  | -0.47193024490420 |
| C  | 1.95755656400591  | 3.57231299482047  | 1.77020988389963  |
| O  | 2.57258372795702  | 3.44562952200434  | 2.73839409194928  |
| C  | -0.53891552430461 | 4.94354060404147  | 1.01297089109851  |
| O  | -1.33054024358534 | 5.57496099860776  | 1.56277555673421  |
| C  | -0.65044548981998 | -1.23323926005115 | 1.23220923672158  |
| C  | -1.06533787053553 | -0.71821688171470 | 2.62664007031170  |
| H  | -0.19099680631423 | -0.45739439324587 | 3.23592432902521  |
| H  | -1.71721496654332 | 0.15772146956672  | 2.55881516822022  |
| H  | -1.61429368305622 | -1.51031957387326 | 3.14929373264961  |
| C  | -1.88265419168866 | -1.43568254616607 | 0.34544970458453  |
| H  | -2.41725089235705 | -0.49757510234989 | 0.15802619806481  |
| H  | -1.61276317612955 | -1.87192984033837 | -0.62049101891099 |
| H  | -2.57859052549367 | -2.12370347674944 | 0.84226293384712  |
| C  | 0.11088553744866  | -2.56209517429339 | 1.41089206400206  |
| H  | 0.99624229445205  | -2.42783234949696 | 2.04144924327743  |
| H  | -0.54945376405386 | -3.29076986366468 | 1.89702610147879  |
| H  | 0.43128938823435  | -2.98520640769176 | 0.45464778162116  |
| C  | 1.07777675291583  | -1.33617832007919 | -1.73069478546745 |
| H  | 1.23337197825790  | -1.21570849932452 | -2.80528762430353 |
| H  | 2.04534301666014  | -1.53181338566143 | -1.25071280361483 |
| H  | 0.42129364550932  | -2.19341669717668 | -1.57733955025648 |
| N  | 0.41395565489785  | -0.11282519710291 | -1.20017488471234 |
| Li | -1.28775888431293 | 0.27975953502660  | -2.38519187762578 |
| O  | -0.39678687002410 | 1.18435513186376  | -3.89257880325484 |
| C  | 0.95028412746298  | 1.49973225035030  | -4.31589463272993 |
| H  | 1.15005506974424  | 2.56062659907290  | -4.11875062930638 |
| H  | 1.63775638484251  | 0.88412285336655  | -3.73258769004264 |
| C  | 0.96038784111806  | 1.19318607052803  | -5.81331894033563 |
| H  | 1.19848259482532  | 0.13875265360398  | -5.97779884609606 |
| H  | 1.69850968472329  | 1.79845726739903  | -6.34466873153055 |
| C  | -0.49498720583750 | 1.50065183050240  | -6.25697899266883 |
| H  | -0.54791124973699 | 2.39973158870824  | -6.87525625817785 |
| H  | -0.91014727347673 | 0.67002775280241  | -6.83250737572390 |
| C  | -1.26329815275029 | 1.70848646203768  | -4.93855042438065 |
| H  | -2.20581631533439 | 1.16431927875717  | -4.87029501994819 |
| H  | -1.44772871307472 | 2.76792728512438  | -4.73362418039427 |
| O  | -1.98489559076330 | -1.36669923923311 | -3.15302826685140 |
| C  | -1.49210170816683 | -1.97252490657058 | -4.37772233229977 |
| H  | -0.67051128681284 | -1.34851440539818 | -4.73117601219199 |
| H  | -1.11368274772126 | -2.97390271612187 | -4.14115096296639 |
| C  | -2.69852881145196 | -2.03331820033819 | -5.33966976521404 |
| H  | -2.81483124939382 | -3.04376223632195 | -5.73926547242913 |
| H  | -2.57546522103600 | -1.34961976475524 | -6.18286080803151 |
| C  | -3.90893884342350 | -1.63046702793670 | -4.45900413845839 |
| H  | -4.78536716799803 | -2.25805776219916 | -4.63845818780297 |
| H  | -4.18635709009368 | -0.58718138039076 | -4.63644326944109 |
| C  | -3.37308646201033 | -1.77617263247411 | -3.03926560455133 |
| H  | -3.40712825572545 | -2.81709580654842 | -2.69048508030649 |
| H  | -3.84046110773078 | -1.11465945633072 | -2.30833232991218 |
| I  | -3.38487030817251 | 1.91529953795414  | -1.68583160302614 |
| C  | -0.47093011271436 | 1.58822354328034  | 0.69125783122023  |
| H  | -0.28185708231697 | 2.11092381024518  | 1.63070014849675  |
| H  | -1.54976150619780 | 1.44360680226360  | 0.57329144749395  |
| H  | -0.24701431170042 | 2.17841386230749  | -0.24503981908710 |

TS([Li(thf)<sub>2</sub>I]10b·[W]→[Li(thf)<sub>2</sub>I]7b)

Energy = -2041.35699874136

ZPE = 0.4872217573

G<sub>corr</sub> = 0.4190279648

Imf = -122.37 cm<sup>-1</sup>

|    |                   |                   |                   |
|----|-------------------|-------------------|-------------------|
| P  | 0.77199531397702  | 0.10531366532806  | 2.32134652109296  |
| H  | 1.11331484111859  | 0.49519743663567  | 0.13460774804407  |
| W  | 1.97925878795360  | 3.11048577827548  | 1.86855104870668  |
| C  | 3.24761302942391  | 1.76275196229916  | 0.97013595069755  |
| O  | 4.01765130574371  | 1.06173760708307  | 0.46671590712682  |
| C  | 1.28063484469633  | 3.74035515046527  | 0.04005390987295  |
| O  | 0.92413876595132  | 4.14452675353329  | -0.98330013154409 |
| C  | 3.42654319207034  | 4.41895908800406  | 1.71983219192101  |
| O  | 4.28516343422443  | 5.20298157047045  | 1.62822453421123  |
| C  | 2.68930455721898  | 2.49498911309368  | 3.71636190165101  |
| O  | 3.11334197618474  | 2.17791934219070  | 4.73986483160393  |
| C  | 0.83171649001377  | 4.56546939021702  | 2.78255146491185  |
| O  | 0.24914827220081  | 5.42892203239035  | 3.27894446958548  |
| C  | -0.20266780395834 | -1.27508215991940 | 3.15229142191267  |
| C  | -0.75798231868177 | -0.66902214660353 | 4.45667587752456  |
| H  | 0.02613935186934  | -0.16309861149700 | 5.03353340100340  |
| H  | -1.56400917881974 | 0.04382097077277  | 4.26134611975085  |
| H  | -1.16192042090348 | -1.47716529871401 | 5.07751672353518  |
| C  | -1.34480460138998 | -1.80347866332781 | 2.27800003355497  |
| H  | -2.02299188242330 | -1.00470841341698 | 1.95837020356782  |
| H  | -0.96641358179579 | -2.31011498152248 | 1.38556788286818  |
| H  | -1.93174238826935 | -2.53038018111707 | 2.85406652889049  |
| C  | 0.77902970332627  | -2.40622930013791 | 3.51520670937725  |
| H  | 1.59635172105745  | -2.03232627673736 | 4.14084198256059  |
| H  | 0.24119229963074  | -3.17880101548232 | 4.07811415453200  |
| H  | 1.21230554955741  | -2.87698734391507 | 2.62852649919411  |
| C  | 1.59483885039483  | -1.48351418443500 | 0.25096198612796  |
| H  | 1.79161213343609  | -1.46736083106434 | -0.82272006529864 |
| H  | 2.55199206416968  | -1.45994665785134 | 0.78655522469608  |
| H  | 1.07289842194762  | -2.41130406584662 | 0.48704593332694  |
| N  | 0.71750604053655  | -0.32942859296197 | 0.59680537780214  |
| Li | -0.98123052093825 | -0.31442698995041 | -0.67392949117203 |
| O  | -0.16023921092785 | 0.77470924403974  | -2.10939233670244 |
| C  | 1.22559829743024  | 0.89993417846351  | -2.55215732874048 |
| H  | 1.80727606213310  | 1.36593838867507  | -1.75035361930648 |
| H  | 1.61478598526513  | -0.10684986703296 | -2.73981755272591 |
| C  | 1.19140427881693  | 1.74445766940721  | -3.82458731901488 |
| H  | 1.99064242692998  | 1.46709607685943  | -4.51567176754144 |
| H  | 1.29249517958790  | 2.80601795629217  | -3.57995723543901 |
| C  | -0.21435391849825 | 1.45726826132113  | -4.37331702630509 |
| H  | -0.56880768389822 | 2.22961578060956  | -5.06013222662888 |
| H  | -0.23818580448432 | 0.49025697261775  | -4.88759231237521 |
| C  | -1.03999911022692 | 1.40170091065193  | -3.09716823472808 |
| H  | -1.94151421923354 | 0.79006789646743  | -3.15972004211054 |
| H  | -1.30748560274728 | 2.40056572238299  | -2.73559716129122 |
| O  | -1.23179950667782 | -2.12074308166768 | -1.35950046594460 |
| C  | -0.68224696590877 | -2.53454511832385 | -2.63744553055028 |
| H  | 0.05219474548784  | -1.78467094626085 | -2.93201228784538 |
| H  | -0.18317073701925 | -3.50177470055050 | -2.50130220663188 |
| C  | -1.88628987007035 | -2.64775490091651 | -3.59159792154833 |
| H  | -1.81105568510382 | -3.55225604535576 | -4.20011135255833 |
| H  | -1.93824478917086 | -1.78988316779169 | -4.26632668304965 |
| C  | -3.11733388780660 | -2.68407516918328 | -2.64511245433324 |
| H  | -3.79704595023184 | -3.50884207146475 | -2.87284141821846 |
| H  | -3.67473021529528 | -1.74529027809924 | -2.70456843832202 |
| C  | -2.50078636504359 | -2.81967177417332 | -1.25374609417357 |
| H  | -2.30017128359634 | -3.86678204805552 | -0.99087537689490 |

|   |                   |                   |                   |
|---|-------------------|-------------------|-------------------|
| H | -3.07061096428226 | -2.33141138273584 | -0.46218744888233 |
| I | -3.46880292877212 | 0.77716286727544  | -0.17464156944581 |
| C | -0.46481833530909 | 1.47241647907277  | 2.24582747879907  |
| H | -0.62847418922483 | 1.89291952958977  | 3.23846099267358  |
| H | -1.42350616262307 | 1.17883766945791  | 1.79422873992268  |
| H | -0.10465183902238 | 2.28553080216955  | 1.57054934827711  |

**K-4b** [W(CO)<sub>5</sub>P<sup>t</sup>Bu(H)NMeK]

Energy = -1830.532815133371

ZPE = 0.21124458

G<sub>corr</sub> = 0.15895209

|   |                   |                   |                   |
|---|-------------------|-------------------|-------------------|
| P | -1.33172634949443 | -0.21242232068444 | 0.12577092712561  |
| H | -0.46690593036400 | -0.06636174006069 | -1.01228267680592 |
| W | -0.50033232082024 | 1.25346151200537  | 2.08587909592454  |
| C | -1.36022664714947 | 2.76326501741842  | 0.99288527523343  |
| O | -1.86673474750360 | 3.62461580791761  | 0.40208738995820  |
| C | -2.28895717207177 | 0.82747090526056  | 2.97545504496936  |
| O | -3.32169249091267 | 0.56587745901109  | 3.44656182404631  |
| C | 0.05240272395722  | 2.60560534875239  | 3.47761214520197  |
| O | 0.35814841822630  | 3.40444845540778  | 4.26986903503870  |
| C | 1.24372299184643  | 1.41453745271509  | 1.00201175715983  |
| O | 2.20973066161657  | 1.46052443050377  | 0.36486259371660  |
| C | 0.37057542634805  | -0.19595088609189 | 3.25918757673559  |
| O | 0.87297413846249  | -0.96028711801437 | 3.97233399595585  |
| C | -1.02632480338600 | -2.06662089429112 | 0.33046523475901  |
| C | 0.48766745157018  | -2.29091667816013 | 0.43632832787354  |
| H | 0.99699289217643  | -1.96767409306161 | -0.47911624566186 |
| H | 0.92055456394377  | -1.74158445927812 | 1.27762180261881  |
| H | 0.69873654225299  | -3.35805453064455 | 0.58399008145468  |
| C | -1.75048241698559 | -2.55375023698275 | 1.59139744590772  |
| H | -1.35135222503520 | -2.07445094873482 | 2.49058135278243  |
| H | -2.82151561347853 | -2.32814388690129 | 1.53285939084291  |
| H | -1.63311073644074 | -3.63951439840337 | 1.70137131369165  |
| C | -1.57066195757437 | -2.81121406524843 | -0.89971381535398 |
| H | -1.13348681654834 | -2.42454312185922 | -1.82744313465081 |
| H | -1.32046642853993 | -3.87819531981502 | -0.82491223845664 |
| H | -2.65844786070200 | -2.72202626939654 | -0.96555489083235 |
| C | -3.22626664485331 | -0.07849329924605 | -1.72995056978596 |
| H | -3.93900900152746 | 0.68678138902236  | -2.07833061737450 |
| H | -2.37571312292915 | -0.06463516618284 | -2.43587187127381 |
| H | -3.72601785219101 | -1.05263341086912 | -1.85609178344990 |
| N | -2.82697391109461 | 0.20909017996300  | -0.34835625799544 |
| K | -4.73370076079799 | 1.66189488594892  | 0.73709249064445  |

**Li-4b** [W(CO)<sub>5</sub>P<sup>t</sup>Bu(H)NMeLi]

Energy = -1236.570681351172 (CPCM<sub>THF</sub>/TPSS-D3/def2-TZVP(ecp))

ZPE = 0.21372213

G<sub>corr</sub> = 0.16362457

|   |                   |                   |                   |
|---|-------------------|-------------------|-------------------|
| P | -1.40906532054806 | -0.18494598231817 | 0.17948650102334  |
| H | -0.70112300051913 | 0.07582367019789  | -1.03546330214679 |
| W | -0.48831176141966 | 1.30019220188251  | 2.07899186207226  |
| C | -1.11786168591634 | 2.82132982728504  | 0.84073619073208  |
| O | -1.48635472870915 | 3.67891968217958  | 0.15741709897776  |
| C | -2.37743139372422 | 1.13392872159852  | 2.77658279183025  |
| O | -3.51013717168678 | 0.99206933766312  | 3.04628879957246  |
| C | 0.12792252892308  | 2.66586318439769  | 3.43793985203162  |
| O | 0.46266939427995  | 3.46733523271140  | 4.21279526495027  |
| C | 1.31828029566149  | 1.22917642277160  | 1.07772660654770  |
| O | 2.30683579905535  | 1.15941490665076  | 0.48136368494487  |

|    |                   |                   |                   |
|----|-------------------|-------------------|-------------------|
| C  | 0.13729845430585  | -0.17644403625815 | 3.36746997174418  |
| O  | 0.49956530758143  | -0.96540669787347 | 4.13611114604057  |
| C  | -0.97888604397824 | -2.01804129798830 | 0.27746348105398  |
| C  | 0.54264577835363  | -2.15072666556748 | 0.42251405945159  |
| H  | 1.06252886275007  | -1.68625830866999 | -0.42389319446899 |
| H  | 0.90262502020584  | -1.68265759718826 | 1.34331384216349  |
| H  | 0.82197636022276  | -3.21174350897762 | 0.44910037497054  |
| C  | -1.70655734217925 | -2.62122342524288 | 1.48552702442381  |
| H  | -1.39738146902861 | -2.14125143547120 | 2.41926889811390  |
| H  | -2.79114592304213 | -2.50108653118137 | 1.38146202865616  |
| H  | -1.48652335849399 | -3.69336476474442 | 1.56329923686385  |
| C  | -1.43632525447281 | -2.72136273502477 | -1.01164814301793 |
| H  | -0.99010110898223 | -2.25878480418942 | -1.89925919618425 |
| H  | -1.12612552061160 | -3.77447023070522 | -0.98501150814176 |
| H  | -2.52424833376705 | -2.69238556428704 | -1.11512443842572 |
| C  | -3.47995397173826 | -0.10609637194639 | -1.49497183370126 |
| H  | -4.27815891354231 | 0.61463079925098  | -1.72126048847441 |
| H  | -2.69151137228331 | 0.03022727779818  | -2.25396661710697 |
| H  | -3.90082722300107 | -1.11226576729557 | -1.64840474493673 |
| N  | -2.98397528636960 | 0.12364173180484  | -0.12850741402636 |
| Li | -4.33894161732566 | 0.39606272873764  | 1.18125216446647  |

**Li(12c4)-4b** [W(CO)<sub>5</sub>P<sup>t</sup>Bu(H)NMeLi(12c4)]

Energy = -1852.292046717501 (CPCM<sub>THF</sub>/TPSS-D3/def2-TZVP(ecp))

ZPE = 0.45703893

G<sub>corr</sub> = 0.39420169

|   |                   |                   |                   |
|---|-------------------|-------------------|-------------------|
| P | -0.94771263397968 | -0.18058829251124 | 0.14309520623575  |
| H | -0.28994058034368 | 0.11189839460396  | -1.09221414028854 |
| W | 0.40471944432115  | 1.03157203277760  | 2.00409808612210  |
| C | -0.86597032164187 | 2.60209167252766  | 1.61804210234222  |
| O | -1.52228652922296 | 3.53108260445335  | 1.39696455805635  |
| C | -0.69102394934993 | 0.20026103156472  | 3.53187211769565  |
| O | -1.19127971586772 | -0.31485678099286 | 4.44251891844514  |
| C | 1.39024335175668  | 2.20848438458875  | 3.30287373545171  |
| O | 1.95291659277946  | 2.90921266124046  | 4.04736661227732  |
| C | 1.59790417786290  | 1.62132259090027  | 0.44118829032513  |
| O | 2.27949405207466  | 1.91480690873456  | -0.44941060285596 |
| C | 1.77105916266107  | -0.44414054672597 | 2.41631280003383  |
| O | 2.57626905711820  | -1.22834722863053 | 2.70680858384126  |
| C | -0.65455977653246 | -2.05275161925268 | 0.04802857045664  |
| C | 0.80151896017626  | -2.28900497714626 | -0.37271075469848 |
| H | 0.97696688612016  | -1.92878429182834 | -1.39242040973097 |
| H | 1.50273204986563  | -1.77765251999217 | 0.29329004251397  |
| H | 1.03291568429161  | -3.36192256620128 | -0.34326713579128 |
| C | -0.93237964271646 | -2.67658479936213 | 1.42125678398798  |
| H | -0.21387907264606 | -2.32238672499539 | 2.16671223444831  |
| H | -1.93485861541065 | -2.41666444891322 | 1.77663776494846  |
| H | -0.85838675433897 | -3.77023962186140 | 1.36374184029099  |
| C | -1.59918906725097 | -2.65205758274187 | -1.00335818461078 |
| H | -1.39946994485465 | -2.23846038050595 | -1.99764859667825 |
| H | -1.46110146478619 | -3.74060665131202 | -1.05075268280022 |
| H | -2.64498888006579 | -2.44907335958168 | -0.75334412331450 |
| C | -2.87748633999143 | 0.35434723945030  | -1.53602848639525 |
| H | -3.67367632040764 | 1.09562062855305  | -1.66295420835638 |
| H | -2.03011090414740 | 0.65672954791111  | -2.17632520346656 |
| H | -3.25055557688550 | -0.59853755285925 | -1.94858165786116 |
| N | -2.49865208314288 | 0.28266268585868  | -0.11245271445119 |
| H | -6.86443970998491 | -1.50496887048226 | -0.65478117028405 |
| C | -6.07051207803372 | -0.78324942079128 | -0.42123798812302 |

|    |                   |                   |                   |
|----|-------------------|-------------------|-------------------|
| C  | -6.58129764038103 | 0.63362964287622  | -0.62320838218851 |
| H  | -5.19979490294345 | -0.99143152653999 | -1.05558952551352 |
| O  | -5.69677499330613 | -0.86201036365968 | 0.96281684791982  |
| O  | -5.54194286943773 | 1.55024526778438  | -0.22842718225061 |
| H  | -7.46598326885197 | 0.79842100877337  | 0.00290040192161  |
| H  | -6.85109202716803 | 0.79329470984050  | -1.67469599744905 |
| C  | -5.00275474883336 | -2.04731806955788 | 1.38048089330791  |
| C  | -5.98454370673625 | 2.73681165330330  | 0.46017832823014  |
| H  | -5.64210993385062 | -2.93536211432868 | 1.29355455858787  |
| H  | -4.10614746712122 | -2.18344569016337 | 0.76055811684437  |
| C  | -4.63292868127218 | -1.80058976120059 | 2.83384567272269  |
| C  | -4.98827387635137 | 3.02381352549957  | 1.57123024127842  |
| H  | -6.97608756117868 | 2.55673446492189  | 0.89125073121605  |
| H  | -6.04132375198397 | 3.58237430475563  | -0.23625744888921 |
| H  | -5.54281318875730 | -1.71776065600835 | 3.43884343826508  |
| H  | -4.02030824446942 | -2.62394186676068 | 3.22064106920663  |
| O  | -3.89879838832390 | -0.56270263149473 | 2.90100340569100  |
| H  | -3.99712517236248 | 3.26913007964230  | 1.17148761614461  |
| H  | -5.34286375373942 | 3.85360337538525  | 2.19583780855288  |
| O  | -4.93175159607253 | 1.80055032568155  | 2.32081423575128  |
| C  | -4.26513534656202 | 0.31409682018772  | 3.98577666851335  |
| C  | -4.10109408632306 | 1.73896740995821  | 3.48942016055264  |
| H  | -5.31389556270758 | 0.13949149144993  | 4.25302263279694  |
| H  | -3.63127833293330 | 0.12866591886166  | 4.85926721751050  |
| H  | -4.43757118981043 | 2.45209565930448  | 4.25247289336258  |
| H  | -3.05738905758022 | 1.95630779935726  | 3.22909256040396  |
| Li | -4.09560010836861 | 0.45961507565401  | 1.05996284974434  |

**K (18c6)-4b** [W(CO)<sub>5</sub>P<sup>t</sup>Bu(H)NMeK(18c6)]

Energy = -2752.569821183483 (CPCM<sub>THF</sub>/TPSS-D3/def2-TZVP(ecp))

ZPE = 0.57387940

G<sub>corr</sub> = 0.50181279

|   |                   |                   |                   |
|---|-------------------|-------------------|-------------------|
| P | -0.96377892243590 | -0.43274827264555 | -0.21198252584879 |
| H | -0.26529199457699 | -0.61983130688275 | -1.45472266408883 |
| W | 0.62016751492244  | 0.60334932838235  | 1.53893743443307  |
| C | 0.10815192293762  | 2.33762636478882  | 0.54693975076305  |
| O | -0.15246164223890 | 3.32817731754177  | 0.00735774544368  |
| C | -1.05990195833238 | 0.67823992649561  | 2.69787742376971  |
| O | -2.03034300075548 | 0.64744708540102  | 3.33580238280710  |
| C | 1.78054776699544  | 1.68340554714049  | 2.78394678841983  |
| O | 2.43976589523585  | 2.32947151138370  | 3.49955422172672  |
| C | 2.11069835755277  | 0.21878124155921  | 0.18010391724637  |
| O | 2.91394155350315  | -0.04742897678248 | -0.61420941585046 |
| C | 1.16374047260884  | -1.07659240782402 | 2.58111750239954  |
| O | 1.49880919624696  | -1.99050561089053 | 3.21635582060820  |
| C | -1.36250792881167 | -2.26770510699864 | 0.03398499596795  |
| C | -0.06013977315907 | -3.06847104590454 | -0.07734968578399 |
| H | 0.38185780293549  | -2.96155202835494 | -1.07491346350990 |
| H | 0.67889723987114  | -2.73713651489975 | 0.65847552456591  |
| H | -0.25586179118856 | -4.13521670108099 | 0.09559309810857  |
| C | -2.01470939251659 | -2.45781572585621 | 1.40901022825736  |
| H | -1.32767942070536 | -2.18391665718526 | 2.21592967515723  |
| H | -2.91526076878570 | -1.83947932361786 | 1.49972860221820  |
| H | -2.30522906512714 | -3.50758250999196 | 1.54865264114065  |
| C | -2.34382613813578 | -2.70581982013044 | -1.06394527441770 |
| H | -1.93281986850860 | -2.52578822178855 | -2.06390160007761 |
| H | -2.55562144952184 | -3.77981129688815 | -0.96927297672641 |
| H | -3.28941049642219 | -2.16278789138959 | -0.97650328983586 |
| C | -2.75994658495639 | 0.49786276821841  | -1.88687329050747 |

|   |                   |                   |                   |
|---|-------------------|-------------------|-------------------|
| H | -3.21390954805136 | 1.46864247511671  | -2.12317630045413 |
| H | -1.97404430944741 | 0.30281438358004  | -2.64207848458406 |
| H | -3.54063252494233 | -0.26522052515548 | -2.05750925657200 |
| N | -2.23544036046920 | 0.52277305670732  | -0.52101299301254 |
| H | -3.46683289547414 | 5.80095774898255  | -0.76831856688676 |
| C | -3.72579471348378 | 4.74084470420292  | -0.63316420096403 |
| O | -4.08923792540888 | 4.49383334060459  | 0.73160357393769  |
| H | -2.85758375280223 | 4.12689301152171  | -0.91212682380150 |
| C | -4.92143148228988 | 4.40307087304883  | -1.49174222925538 |
| C | -3.10567346666879 | 4.94838759515394  | 1.66994929838882  |
| H | -5.80410914356532 | 4.95683852663883  | -1.13923101051441 |
| H | -4.72255341854167 | 4.68375098455678  | -2.53676611724774 |
| O | -5.15972281337221 | 2.99515712922765  | -1.39826185244157 |
| C | -3.69384945964017 | 4.80535713529157  | 3.05256013275666  |
| H | -2.86647179650606 | 6.00542845496859  | 1.48355447956533  |
| H | -2.18312759357385 | 4.35957622355038  | 1.57210510491913  |
| C | -6.37806327061948 | 2.60481341855471  | -2.03877985714073 |
| O | -3.87831791971501 | 3.41275405437510  | 3.33414196413194  |
| H | -4.66206451268324 | 5.32522041171431  | 3.09836923652843  |
| H | -3.01780319065833 | 5.25372482657642  | 3.79565554190293  |
| H | -7.23647853193307 | 3.02827115486865  | -1.49596346356218 |
| H | -6.39977105887655 | 2.97744260140687  | -3.07370844307888 |
| C | -6.44685124288643 | 1.09692226423924  | -2.06393273476947 |
| C | -4.67969839375735 | 3.21834824940559  | 4.50581717227526  |
| H | -7.34370158364088 | 0.78020238151984  | -2.61665568332635 |
| H | -5.56071991153590 | 0.68719782791732  | -2.56603270641747 |
| O | -6.50991047030959 | 0.60902591185755  | -0.71596981053093 |
| C | -4.72296205359820 | 1.74808031197240  | 4.84191036448813  |
| H | -5.69308413994829 | 3.60807317489676  | 4.32641763017521  |
| H | -4.24281944305366 | 3.76151806347754  | 5.35719726449792  |
| C | -6.42454868687580 | -0.82190843128685 | -0.66814622025870 |
| O | -5.37911478494837 | 1.04253757429457  | 3.77825211612063  |
| H | -5.28278456550514 | 1.60988744856525  | 5.77924383518667  |
| H | -3.70717650785296 | 1.35889623022653  | 4.97682571727898  |
| H | -5.40656076877465 | -1.14155352696419 | -0.93395119173386 |
| H | -7.12767282315077 | -1.26694170651194 | -1.38695039974836 |
| C | -6.79501076916942 | -1.28616272959973 | 0.71869570027803  |
| C | -5.32887238512384 | -0.37710918410743 | 3.97828768851590  |
| H | -7.80029195971253 | -0.92305808129603 | 0.97823793505838  |
| H | -6.80234578784527 | -2.38624110338960 | 0.74480346242063  |
| O | -5.84740607568499 | -0.77785496472490 | 1.66494602065516  |
| C | -6.27456381016087 | -1.03990883070345 | 3.00737048541739  |
| H | -5.64907062239942 | -0.62563858095798 | 5.00079840068796  |
| H | -4.29987761207807 | -0.73572333444919 | 3.83827807093514  |
| H | -7.29343182241941 | -0.64956663604493 | 3.14733250958358  |
| H | -6.28589796794742 | -2.12410265078040 | 3.19512687820943  |
| K | -4.31489964952908 | 1.58447706515184  | 1.03400419599963  |

**Li(12c4)-5b** [W(CO)<sub>5</sub>P<sup>t</sup>Bu(Li(12c4))NHMe]

Energy = -1852.293347561089 (CPCM<sub>THF</sub>/TPSS-D3/def2-TZVP(ecp))

ZPE = 0.45932080

G<sub>corr</sub> = 0.39772005

|   |                   |                  |                  |
|---|-------------------|------------------|------------------|
| W | -0.33078516310348 | 0.80202301940875 | 2.70703214075596 |
| C | 0.99873148460549  | 1.75351554412369 | 1.46893305719489 |
| O | 1.82098015682542  | 2.27176095591995 | 0.83113753254056 |
| C | -1.86819992628800 | 2.07354975524735 | 2.21482051343027 |
| O | -2.73658671378873 | 2.79818843563529 | 1.95165578413600 |
| C | 0.19608622320846  | 2.00404461928996 | 4.22096375942870 |
| O | 0.47939088034621  | 2.71129737143205 | 5.10951897688203 |

|    |                   |                   |                   |
|----|-------------------|-------------------|-------------------|
| C  | 1.21985424699472  | -0.44543444888301 | 3.20874061860531  |
| O  | 2.11738627806563  | -1.10450014123985 | 3.54348092864424  |
| C  | -1.51988509540188 | -0.30823715486340 | 3.96077255904536  |
| O  | -2.15513935548304 | -0.94944657087468 | 4.69237530428944  |
| C  | -0.61776458476370 | -2.30440309925106 | 0.58405697528415  |
| C  | 0.85563420114806  | -2.18009345963256 | 0.18083068647079  |
| H  | 0.96874744286437  | -1.68465037857405 | -0.78996301472673 |
| H  | 1.42000243716382  | -1.59991574884183 | 0.91692457208121  |
| H  | 1.31500020603026  | -3.17442469826587 | 0.10376810508642  |
| C  | -0.74396698004838 | -3.04516283107397 | 1.91934014889431  |
| H  | -0.15465924832175 | -2.55969765992025 | 2.70161901604568  |
| H  | -1.79025318980425 | -3.06911138897239 | 2.24155202457139  |
| H  | -0.39001466232814 | -4.08085467790102 | 1.81460384416422  |
| C  | -1.39930862887175 | -3.08863792914927 | -0.48437059345416 |
| H  | -1.34902633550318 | -2.59841882559120 | -1.46159936783536 |
| H  | -0.99171718491271 | -4.10445511044130 | -0.58444947568924 |
| H  | -2.45367054665256 | -3.16901333842571 | -0.19961274129664 |
| C  | -4.10657676634515 | -0.65366966595577 | 0.30763369128639  |
| H  | -5.02131539248897 | -1.12663958141752 | 0.68545715888757  |
| H  | -4.30635028748192 | 0.42660901215046  | 0.20475947413937  |
| H  | -3.89583394960663 | -1.06158351002002 | -0.68530270047053 |
| N  | -2.98692782113004 | -0.96167539468146 | 1.19426666587950  |
| H  | -3.18664016054968 | -0.66811487469907 | 2.14458652006965  |
| P  | -1.36170407115357 | -0.55294643058975 | 0.66749224263897  |
| H  | -1.60525729587428 | -2.03331461999526 | -4.16579210958202 |
| C  | -1.54883602774283 | -0.95168270688751 | -3.99752704589681 |
| C  | -0.21371896326632 | -0.58196215593926 | -3.37237084198447 |
| H  | -1.66629783937697 | -0.43257684609752 | -4.95472253700226 |
| O  | -2.60429443305916 | -0.53490985093391 | -3.09975190939526 |
| O  | -0.30687301896850 | 0.82046034579006  | -3.07216491050162 |
| H  | 0.60446373864741  | -0.78409162207360 | -4.07503476690079 |
| H  | -0.03854442098221 | -1.14354028607301 | -2.44633792037535 |
| C  | -3.73068039932351 | 0.10123060901725  | -3.74667521993471 |
| C  | 0.76127102962856  | 1.40007552153183  | -2.29653654617669 |
| H  | -3.39020897739282 | 0.56049349675894  | -4.68146313920559 |
| H  | -4.50819696982394 | -0.63895457086523 | -3.97004381767253 |
| C  | -4.27228907273398 | 1.17696426471595  | -2.81907216809303 |
| C  | 0.27312721596001  | 2.79082999076704  | -1.93704624718808 |
| H  | 1.68618373886895  | 1.45654954814448  | -2.88339515942340 |
| H  | 0.93613337570558  | 0.79356271597982  | -1.39830815150310 |
| H  | -5.02512070345591 | 1.77743284439986  | -3.34509287174449 |
| H  | -4.72293279066580 | 0.75217834708966  | -1.91543286421308 |
| O  | -3.13072917466274 | 1.97674946100953  | -2.47424841913423 |
| O  | -0.95395637222986 | 2.64213554995522  | -1.18878758294593 |
| H  | 0.07094689310345  | 3.35812380386131  | -2.85299716610698 |
| H  | 1.02125104028676  | 3.32017970755765  | -1.33876776869863 |
| C  | -3.30313090131739 | 3.02186752458150  | -1.50179660481833 |
| C  | -1.93484804500044 | 3.68065558716866  | -1.39892089487018 |
| H  | -3.62281506795590 | 2.59245039470193  | -0.54393327244189 |
| H  | -4.05074242609178 | 3.75197235590240  | -1.83521749807401 |
| H  | -1.70735404068615 | 4.20561616684150  | -2.33316167012596 |
| H  | -1.91156588806223 | 4.39383589806474  | -0.56735560022691 |
| Li | -1.74237169675296 | 0.78046673108345  | -1.67176970274341 |

**K-5b** [W(CO)<sub>5</sub>P<sup>t</sup>Bu(K)NHMe]

Energy = -1828.981371840752 (CPCM<sub>THF</sub>/TPSS-D3/def2-TZVP(ecp))

ZPE = 0.22167708

G<sub>corr</sub> = 0.17118149

|   |                   |                  |                  |
|---|-------------------|------------------|------------------|
| W | -0.69056375430749 | 1.20607671430705 | 2.08647506198705 |
|---|-------------------|------------------|------------------|

|   |                   |                   |                   |
|---|-------------------|-------------------|-------------------|
| C | 0.21891082073670  | 2.22867843427773  | 0.57770699613918  |
| O | 0.69045664166057  | 2.74567757753331  | -0.35743889724370 |
| C | -2.43794277138541 | 2.22858209605661  | 1.74034269761996  |
| O | -3.41975729335704 | 2.81665972955828  | 1.54321350903164  |
| C | -0.21879193440454 | 2.50897888913796  | 3.53981796616217  |
| O | 0.03887419454878  | 3.26975432282702  | 4.39002586747305  |
| C | 1.06953940764250  | 0.22304549839883  | 2.48372798649098  |
| O | 2.07527791854928  | -0.29123928632766 | 2.75555422332648  |
| C | -1.67333780898897 | -0.11681276973775 | 3.31481960866727  |
| O | -2.23912993741741 | -0.89206554700708 | 3.96805456763812  |
| C | -0.64378781186646 | -1.94217335894502 | -0.04525064333310 |
| C | 0.77686208611100  | -1.61448621709994 | -0.52208753499732 |
| H | 0.75620388519327  | -1.10576408621450 | -1.49450601870307 |
| H | 1.29880145330838  | -0.96607613509230 | 0.18833724354892  |
| H | 1.36296392623628  | -2.53575366236426 | -0.63627535733920 |
| C | -0.61431911036853 | -2.71945060452609 | 1.27420532896073  |
| H | -0.06135858676775 | -2.17124745748619 | 2.04238903749736  |
| H | -1.63274597872879 | -2.88941662308976 | 1.64024241034706  |
| H | -0.13249657336727 | -3.69785387963174 | 1.13443944108796  |
| C | -1.36443891673616 | -2.78109460522217 | -1.11498657519560 |
| H | -1.37264823616283 | -2.26293041706109 | -2.08156004739192 |
| H | -0.85526778225769 | -3.74621186810335 | -1.24546847074315 |
| H | -2.40039385595486 | -2.97333743451158 | -0.81749208570886 |
| C | -4.27248450087479 | -0.44802933915075 | -0.38754195238653 |
| H | -5.20312692606815 | -0.92552293647991 | -0.05869985322654 |
| H | -4.44238577599086 | 0.64046649782603  | -0.43283322341463 |
| H | -4.04621672075004 | -0.79888075011224 | -1.39940369619106 |
| N | -3.17964886085144 | -0.84052936588210 | 0.51020089338423  |
| H | -3.43214412316878 | -0.66803382525941 | 1.47855259262335  |
| P | -1.57233707066346 | -0.29427974224162 | 0.08774641336705  |
| K | -1.31906600354807 | 1.55927015162375  | -2.54120748947784 |

**K(18c6)-5b** [W(CO)<sub>5</sub>P<sup>t</sup>Bu(K(18c6))NHMe]

Energy = -2752.580917412071 (CPCM<sub>THF</sub>/TPSS-D3/def2-TZVP(ecp))

ZPE = 0.57708842

G<sub>corr</sub> = 0.50476082

|   |                   |                   |                   |
|---|-------------------|-------------------|-------------------|
| W | -2.57808710767234 | 0.90523878494237  | 2.56979561596108  |
| C | -1.89183584254214 | 2.68654182153737  | 1.82816046309493  |
| O | -1.43861703702790 | 3.66783970740917  | 1.39862394209684  |
| C | -4.29281110190659 | 0.97970878639319  | 1.44669081839002  |
| O | -5.31196639653633 | 1.06371348678445  | 0.88887249446340  |
| C | -3.67226735748196 | 1.67574914776722  | 4.05596922789095  |
| O | -4.31982955930119 | 2.10932493398314  | 4.93134485983981  |
| C | -1.01323703884131 | 0.92871766569005  | 3.89554099522718  |
| O | -0.18773765807333 | 0.97876428920185  | 4.71475451831537  |
| C | -2.86308454032424 | -1.07475770498578 | 2.96767240352877  |
| O | -2.94734920329142 | -2.22869682769289 | 3.10671999547428  |
| C | 0.47811072718253  | -0.53615367199392 | 0.84820343757020  |
| C | 1.17361034876809  | 0.78869508523109  | 1.18851897501397  |
| H | 1.05754753593900  | 1.50962389649156  | 0.37044405466908  |
| H | 0.75988483447943  | 1.24049779412642  | 2.09388492813679  |
| H | 2.24733314475013  | 0.62177397412901  | 1.34576954757453  |
| C | 0.61671163938754  | -1.52498529724551 | 2.01311846898549  |
| H | 0.12264888634480  | -1.14969757727194 | 2.91305991925937  |
| H | 0.18147517176306  | -2.49917223717624 | 1.76264020966233  |
| H | 1.67853030020747  | -1.69065164771783 | 2.24444778137141  |
| C | 1.13725618223119  | -1.13843441508122 | -0.40630428532215 |
| H | 1.14298834838561  | -0.42424413679091 | -1.23562878308379 |
| H | 2.17925462618749  | -1.41182565929966 | -0.18681767550092 |



|   |                   |                   |                   |
|---|-------------------|-------------------|-------------------|
| H | 0.60041481159381  | -2.03571085574161 | -0.72857243269895 |
| C | -3.24643358482924 | -1.85680669476741 | -0.41404681371854 |
| H | -3.46363350218672 | -2.89274588927093 | -0.69877533146467 |
| H | -4.00374819211892 | -1.53591221338878 | 0.31984179556977  |
| H | -3.34440120690681 | -1.22405508598704 | -1.30065446914487 |
| N | -1.87278351661234 | -1.76531084006712 | 0.09322974907665  |
| H | -1.77912367583975 | -2.37811126173867 | 0.90445086361906  |
| P | -1.32276640771694 | -0.12889581181974 | 0.41542696244520  |
| H | -5.93741144590916 | 1.90562940210691  | -2.82887041324003 |
| C | -4.93951677666461 | 1.45585746076771  | -2.72139037122801 |
| C | -4.71792568886058 | 0.45834481465118  | -3.83192010329622 |
| H | -4.88486957197319 | 0.95695429465144  | -1.74507094046362 |
| O | -3.93304288785584 | 2.47607758695641  | -2.80367639141780 |
| O | -3.47198425692931 | -0.21148916022984 | -3.60295322144664 |
| H | -4.69546581846014 | 0.96085314652543  | -4.81002098754640 |
| H | -5.54164752521319 | -0.27029098169850 | -3.82892880476240 |
| C | -4.05656274928058 | 3.42610672996491  | -1.73365245526082 |
| C | -3.23252979535638 | -1.25035078901804 | -4.55887343152934 |
| H | -3.89998248106633 | 2.92163130431924  | -0.77086206273888 |
| H | -5.06278049138943 | 3.86938217840414  | -1.73926717738722 |
| C | -3.03108082639244 | 4.51633119966204  | -1.92611541091948 |
| C | -1.89132420233105 | -1.87884320961296 | -4.26614820001882 |
| H | -3.24417877909068 | -0.83101700713418 | -5.57560035068500 |
| H | -4.01820236901875 | -2.01655877524683 | -4.48467581737351 |
| H | -3.14928959848274 | 4.99121973828969  | -2.91152238477427 |
| H | -3.17146666408435 | 5.28038231106457  | -1.14744035797332 |
| O | -1.72610758580124 | 3.94096563834592  | -1.81535875605389 |
| O | -0.86876001417323 | -0.89699997989855 | -4.48942857488900 |
| H | -1.74038267573117 | -2.73642919639682 | -4.93768073484788 |
| H | -1.84536743086312 | -2.23348774132642 | -3.22640244049084 |
| C | -0.69238006350961 | 4.92575657210799  | -1.89579215196935 |
| C | 0.44498840952097  | -1.45059143512633 | -4.33093039086403 |
| H | -0.71693177541047 | 5.41453793257469  | -2.88125140333362 |
| H | -0.84018998258481 | 5.69040087786578  | -1.11925726351591 |
| C | 0.63879844773310  | 4.24979263317742  | -1.67246707835359 |
| C | 1.46197842487943  | -0.36687981094466 | -4.59525860034201 |
| H | 0.59461017569802  | -2.26969887834137 | -5.04939863955720 |
| H | 0.56168354632706  | -1.84978860256507 | -3.31390173069610 |
| H | 1.43599345619282  | 5.00707999430331  | -1.68301455971318 |
| H | 0.65076623528536  | 3.73939228412349  | -0.69928809054339 |
| O | 0.85413710723367  | 3.29679664916711  | -2.72434784864313 |
| O | 1.34521178779688  | 0.63669867519404  | -3.57945716693915 |
| H | 1.29425344086818  | 0.08415609402393  | -5.58438387763427 |
| H | 2.47073918695223  | -0.80481004515855 | -4.57485279354495 |
| C | 2.14524007768935  | 2.68075242901200  | -2.62935655617460 |
| C | 2.29559879352060  | 1.69322085756224  | -3.76078025162296 |
| H | 2.93238378568983  | 3.44483838072568  | -2.70592573485758 |
| H | 2.24725254139891  | 2.17128900580608  | -1.66030245037362 |
| H | 2.12343472627159  | 2.18671209741231  | -4.72864093888259 |
| H | 3.31688338786163  | 1.28503485752184  | -3.75065919885815 |
| K | -1.28482570249795 | 1.31961892076095  | -2.65865612153978 |

Li(thf)<sub>3</sub>l

Energy = -1004.15784099119

ZPE = 0.35050582

G<sub>corr</sub> = 0.30047251

|    |                   |                   |                   |
|----|-------------------|-------------------|-------------------|
| Li | 0.15006035680157  | 0.17314553959747  | -0.26893851781143 |
| I  | -0.68886265153951 | -1.38954481501624 | 1.80037384819178  |
| O  | 2.08289882771686  | 0.06894219624505  | -0.37749324489848 |

|   |                   |                   |                   |
|---|-------------------|-------------------|-------------------|
| O | -0.30314762938663 | 2.05314057750172  | 0.03591828658091  |
| O | -0.58872499977425 | -0.41309850119143 | -1.95723901827077 |
| C | -0.24098859869555 | 2.90307584104572  | -1.13947431557710 |
| H | 0.10508269510139  | 3.89689157820514  | -0.82884545607340 |
| H | 0.48925878823374  | 2.46242675874234  | -1.82052596376218 |
| C | 0.13626591551115  | -0.47914404544210 | -3.22412163245028 |
| H | 0.38936962228800  | 0.54139894957679  | -3.52477322683999 |
| H | 1.05772644693408  | -1.04537894191590 | -3.05377453972935 |
| C | -1.84615966000629 | -1.14351164717877 | -2.07425212599231 |
| H | -2.00903663949086 | -1.65255126123003 | -1.12175768330517 |
| H | -2.65409939878488 | -0.42194015648944 | -2.25080447428297 |
| C | -1.65024575719657 | -2.06615893255465 | -3.26833949167182 |
| H | -1.09590507309385 | -2.96194708106881 | -2.96846825651740 |
| H | -2.59909630688848 | -2.37177181901178 | -3.71617285401731 |
| C | -1.55939750484081 | 2.40018877835524  | 0.67680213897844  |
| H | -1.78321747426357 | 1.60426203230038  | 1.38895446670803  |
| H | -1.42684976545586 | 3.35284528194162  | 1.20608326560663  |
| C | -2.55789389482769 | 2.52845965516328  | -0.47793952030180 |
| H | -3.03715664608365 | 1.56493615132031  | -0.66972590570943 |
| H | -3.33877813559759 | 3.25925111038035  | -0.25395590507557 |
| C | -1.67777853995761 | 2.95107821945283  | -1.68790977228041 |
| H | -1.92445463858265 | 3.95348793333296  | -2.04618149140480 |
| H | -1.80041006761086 | 2.25142468925714  | -2.51764026668782 |
| C | 2.62865980700848  | -1.28360064061291 | -0.49226249895101 |
| H | 1.78421248733298  | -1.97227441173214 | -0.58311318915577 |
| H | 3.24329886186788  | -1.32702419941922 | -1.39936066401449 |
| C | 3.45546247582514  | -1.49350983121993 | 0.76920761889204  |
| H | 2.80505965518085  | -1.81161181766064 | 1.59040310145076  |
| H | 4.24375387408758  | -2.23722879607810 | 0.62771076179537  |
| C | 3.99797082993663  | -0.08035711837822 | 1.03260807585594  |
| H | 4.31597823289507  | 0.07010296274765  | 2.06727440742520  |
| H | 4.84385444958210  | 0.13420780258237  | 0.37074044559199  |
| C | 2.80126216660703  | 0.79479612515764  | 0.67346367302695  |
| H | 3.06940115554006  | 1.77506778134084  | 0.27198211085024  |
| H | 2.11996566530795  | 0.91934181083280  | 1.52284326474568  |
| C | -0.79981736847322 | -1.18963166144858 | -4.20137244228716 |
| H | -1.43506608675003 | -0.46357712937739 | -4.71948478649391 |
| H | -0.24762154645819 | -1.76479309805340 | -4.94853203213774 |

### Computed <sup>31</sup>P chemical shifts:

**Table S1.** GIAO TPSS-D3/def2-QZVP computed <sup>31</sup>P chemical shifts (in ppm) using TPSS-D3/def2-TZVP + CPCM optimized geometries, using the experimental <sup>31</sup>P NMR shift of **3b** [W(CO)<sub>5</sub>P<sup>t</sup>Bu(H)NHMe)] at 67.3 ppm as reference.

| Compound              | Shift (ppm) |
|-----------------------|-------------|
| <b>3b</b>             | 67.3        |
| <b>3f</b>             | 86.9        |
| <b>4b<sup>-</sup></b> | 43.6        |
| <b>4b-Li</b>          | 67.9        |
| <b>4b-Li(12c4)</b>    | 72.6        |
| <b>4b-K</b>           | 43.6        |
| <b>4b-K(18c4)</b>     | 62.4        |

| Compound              | Shift (ppm) |
|-----------------------|-------------|
| <b>5b<sup>-</sup></b> | 95.2        |
| <b>5b-Li(12c4)</b>    | 68.1        |
| <b>5b-K</b>           | 86.3        |
| <b>5b-K(18c6)</b>     | 77.1        |
| <b>6b<sup>-</sup></b> | 78.3        |
| <b>7b</b>             | 101.2       |
